# Supplementary material
Source: PubMed Central journal article supplement (PMC6911188)
Supplement: pnas.1913915116.sapp.pdf [file pnas.1913915116.sapp.pdf]

**Supplementary Information for**

**Photoperiodic and clock regulation of the vitamin A pathway in the brain mediates seasonal responsiveness in the monarch butterfly**

Samantha E. Iiams<sup>1,2</sup>, Aldrin B. Lugena<sup>1</sup>, Ying Zhang<sup>1</sup>, Ashley N. Hayden<sup>1</sup>, and Christine Merlin<sup>1,2\*</sup>

<sup>1</sup> Department of Biology and Center for Biological Clocks Research, Texas A&M University, College Station, Texas 77843, USA

<sup>2</sup> Genetics Interdisciplinary Program, Texas A&M University, College Station, Texas 77843, USA

\*Corresponding author: Christine Merlin

Email: [cmerlin@bio.tamu.edu](mailto:cmerlin@bio.tamu.edu)

**This PDF file includes:**

Supplementary Material and Methods  
Figures S1 to S4  
Tables S1 to S5  
Legends for Datasets S1 to S2  
SI References

**Other supplementary materials for this manuscript include the following:**

Datasets S1 to S2

## **Supplementary Information**

### **Material and Methods**

#### **Animal husbandry**

For photoperiodic experiments, wild-type and mutant monarchs maintained in 15-hours light: 9-hours dark at 25°C were hand-paired. Fertilized females were placed in a cage to lay eggs on potted tropical milkweed plants (*Asclepias curassavica*). Eggs were transferred to petri dishes onto milkweed leaves and divided in two groups placed in Percival incubators respectively under 15-hours light: 9-hours dark (long photoperiod; LP) and under 10-hours light: 14-hours dark (short photoperiod; SP), both at constant temperature of 21°C and 70% humidity. Starting at the second instar, larvae were raised individually on semi-artificial diet until pupation. Post-eclosion, adult monarchs were housed in glassine envelopes and were manually fed a 25% honey solution daily until dissection.

For RNA-seq experiments, fall migratory monarch butterflies were captured on October 15, 2014 in College Station, Texas (latitude 30°37'N, longitude 96°20'W). After capture, migrants were housed indoors in glassine envelopes in a Percival incubator under fall-like conditions with light:dark (LD) cycle set to prevailing light conditions (11 h:13 h LD, 0730–1830 Central Standard Time), at a constant temperature of 21 °C with 70% humidity. They were manually fed a 25% honey solution every other day and dissected 8 days after capture. Monarchs used for the LP and SP data sets were raised in the same conditions as for the photoperiodic experiments, and were dissected 7 to 11 days post-eclosion.

#### **Methoprene/vehicle treatment**

Monarch wild-type and *Cry2*<sup>-/-</sup> females were treated topically on their abdomens with 200µg of methoprene in 5µl of acetone or with 5µl of acetone alone on day 1 and day 3 after adult emergence, as previously described (1).

#### **Compound eye painting and antennae removal**

Painting of the compound eyes and removal of the antennae were performed on the

day of eclosion. For eye painting, the labial palps were first cut at the base to expose the entire compound eyes including the retina and the dorsal rim, which were then covered under a dissecting microscope with enamel based clear paint (Model master clear top coat; Testors no. 2736) or black paint (Glossy black; Testors no. 1147) using a fine paintbrush. Monarchs were harnessed to allow the paint to air-dry. The completeness of painting was verified the next day under a dissecting microscope, and touch ups were performed if needed. The light-permissive and light-blocking properties of the clear and black paints, respectively, had previously been characterized (2). Unpainted control monarchs were subjected to labial palps removal similar to painted monarchs. Antennae were removed by clipping them with scissors at the base of the flagellum just above the pedicel as described in (2).

### **RNA-sequencing experiments**

Brains of monarchs raised indoors in LP and SP and of wild-caught migrants were dissected in 0.5X RNA later (Invitrogen) to prevent RNA degradation, the retinal pigmented photoreceptor layer was removed, and the brains were stored at  $-80^{\circ}\text{C}$  until use. For each seasonal phenotype/photoperiodic condition, three pooled brains were collected in two replicates at Zeitgeber time (ZT)1, ZT4, ZT7, ZT10, ZT13, ZT16, ZT19, and ZT22. For each sample, total RNA was extracted using an RNeasy Mini kit (Qiagen). For samples from wild-caught migrants, polyA<sup>+</sup> RNA was isolated from 2  $\mu\text{g}$  of total RNA with NEBNext Poly(A) mRNA Magnetic Isolation Module (New England Biolabs), and multiplexed libraries were prepared using the NEBNext<sup>®</sup> Ultra<sup>™</sup> II Directional RNA Library Prep Kit for Illumina and NEBNext Multiplex Oligos (New England Biolabs) and amplified with 12 PCR cycles, following the manufacturer's recommendations. RNA-seq datasets from brains of summer-like monarchs and clock-deficient mutants used in this study were already available (3). Butterflies were raised in 15:9 LD at  $25^{\circ}\text{C}$ , brains were collected at 3-hours intervals for summer-like monarchs starting at ZT1 and at 6-hours intervals for clock-deficient mutants starting at ZT4, and libraries were prepared as for wild-caught migrants. For samples from monarchs raised in LP and SP, multiplexed libraries were prepared by the Texas A&M AgriLife Genomics and Bioinformatics Facility using polyA<sup>+</sup> RNA isolated from 1  $\mu\text{g}$  of total RNA, and

multiplexed libraries were prepared using the TruSeq Stranded mRNA Library Prep Kit for Illumina, following the manufacturer's recommendations. Libraries quality and size distribution was verified on a Bioanalyzer, libraries were quantified by real-time quantitative PCR, and 16 multiplexed libraries were mixed in equimolar ratios and sequenced on a Hi-seq 2500 (Illumina) using 50bp single end reads.

### **RNA-seq data processing, mapping and identification of cycling transcripts**

The resulting sequencing files were checked for quality control and demultiplexed by the Texas A&M AgriLife Genomics and Bioinformatics Facility. Reads were mapped to the monarch genome (assembly v3; (4)) using TopHat2 (5) with parameters "--read-realign-edit-dist 2 -g 1 --b2-sensitive". On average across LP, SP, summer-like and migrant monarchs, 91.5% of the reads mapped to the monarch genome (Table S4). After mapping, expression levels of transcripts were quantified in each sample using Cufflinks (6, 7). To identify cycling transcripts, RAIN (8) and MetaCycle (9) were used with parameters "period=24, deltat=3, period.delta=3, nr.series=2, method='independent', peak.border=c(0.2, 0.8)" and "timepoints=seq(1, 46, by=3), adjustPhase='predictedPer', combinePvalue='fisher'", respectively. Only genes with three or more reads per kilo base per million mapped reads (RPKM) in at least one time point were considered as expressed and used for subsequent analysis. Rhythmically expressed genes were determined based on fold-change and *p*-values adjusted for multiple testing using Benjamini-Hochberg procedure to control for false discovery rate. Transcripts were considered rhythmically expressed when meeting the following criteria: (1) adjusted *p*-values  $\leq 0.05$  for both RAIN and MetaCycle; and (2) fold-change (maximal/minimal experimental values within a time series)  $\geq 1.3$ . Of the 15,130 genes in the monarch genome, 68.3%, 66.8%, 66.6%, and 68.4% were respectively expressed in the brains of LP, SP, summer-like, and migrant monarchs, of which 2.70%, 2.66%, 2.80% and 3.04% were respectively determined as rhythmically expressed (Table S5).

Comparisons of rhythmic expression were performed between LP and SP monarchs, and between summer-like monarchs and wild-caught migrants. Genes were sorted based on their rhythmic expression in a photoperiod condition or a seasonal form and classified in three groups: (1) rhythmic in both LP and SP or summer-like and migrant monarchs,

(2) rhythmic only in LP or summer-like monarchs, and (3) rhythmic only in SP or migrant monarchs. Heatmaps depicting all categories were produced using heatmap.2 in gplots package for R. To identify the genes that may be responsible for photoperiodic responses, genes present in both comparisons were identified. Results of this overlap analysis are summarized in Fig. 2. The complete list of genes is provided in Table S1. Using BLAST (10), homologous proteins from *Drosophila* and mouse that best matched the protein sequences of the overlapped genes were used to annotate them. Enriched gene ontology of biological processes and KEGG pathway were determined using Metascape (metascape.org).

### **gRNA design and construction**

The gRNA site for CRISPR/Cas9-mediated targeted mutagenesis of *ninaB1* was selected within exon 3 of the 14 exons-containing *ninaB1* using CHOPCHOP target site finder (<http://chopchop.cbu.uib.no/index.php> target site finder; (11, 12)). The gRNA expression vector was constructed by inserting annealed synthetic oligomers into the DR274 plasmid from Addgene (13) at the *BsaI* cleavage site. Oligomer sequences were as follow (F, forward primer; R, reverse primer): F, 5'-TAGGAGTGACAACTATACGACCCG-3' and R, 5'-AAACCGGGTCGTATAGTTGTC-3'.

### **Synthesis of Cas9 mRNA and sgRNA**

*In vitro* transcription of *Streptococcus pyogenes* Cas9 mRNA was performed using the mMessage mMachine T3 transcription kit (Invitrogen) and pCS2-nCas9n expression plasmid from Addgene (14), as previously described (15). The resulting capped PolyA mRNAs were purified by acid-phenol-chloroform extraction and resuspended in RNase-free water following isopropanol precipitation. The sgRNA was *in vitro* transcribed using T7 RNA polymerase (Promega) from purified PCR products containing the T7 promoter, gRNA and gRNA scaffold amplified from the DR274 vectors using the following primers; F: 5'-ATTGAGCCTCAGGAAACAGC-3' and R: 5'-AAAAGCACCGACTCGGTGCC-3'. The sgRNA was then treated with RQ1-DNase and purified by acid phenol-chloroform extraction and resuspended in RNase-free water after

isopropanol precipitation. Cas9 mRNAs and the sgRNA were quantitated by spectrophotometry (NanoDrop 1000) and diluted in RNase-free water to a final concentration of 0.25 µg/µl for the sgRNA and 0.5 µg/µl for Cas9 mRNAs.

### **Egg microinjections**

Eggs were collected and microinjected as previously described (16) with a mix of Cas9 mRNA at 0.5 µg/µl, sgRNA at 0.25 µg/µl, and blue food coloring for visual tracking of the injection. After injection, embryos were placed in an incubator at 25°C and 70% humidity. Developing embryos were transferred into individual small petri dishes containing milkweed leaves until larvae hatched. Larvae were fed milkweed leaves until the second larval instar before being transferred onto semi-artificial diet.

### **Analysis of CRISPR/Cas9-induced mutations and generation of a *ninaB1* monarch loss-of-function line**

PCR fragments flanking the targeted region were amplified from genomic DNA extracted from larval sensors of potential founders at the fifth instar with the following primers: *ninaB1F*, 5'-GTTTCACTTGTACCGTGACTTC-3' and *ninaB1R*, 5'-GGATACTGTTTAGCCAGGTACC-3. PCR products were purified using 2 X modified Sera-Mag Magnetic Speed-beads (GE Healthcare) as previously described (16, 17), and resuspended in 10 µl of RNase-free water. Cas9-based cleavage assays of PCR products (250-350 ng) were performed using a recombinant Cas9 protein (750 ng) and the sgRNA (400-600 ng), as previously described (16). Digested products were purified using 2 X modified Sera-Mag Magnetic Speed-beads before being resolved with agarose gel electrophoresis and EtBr staining. Larvae presenting a high degree of targeting in somatic cells, estimated based on the relative abundance of uncleaved fragments, were selected and reared to adulthood. Surviving adults of opposite sexes presenting the highest level of somaticism were hand-paired in individual cages to establish a mutant line. Eggs were collected and the hatched larvae were screened for the presence of mutated alleles as described above. Uncleaved fragments corresponding to mutated alleles were gel purified and sequenced using one of the primers used for PCR amplification. A 7-base pair deletion causing a frameshift and the introduction of a premature stop codon was selected

to establish a mutant line.

### **Proboscis extension reflex assay**

The proboscis extension reflex (PER) is a response in which stimulation of the chemoreceptors on the middle legs with a sugar solution (unconditioned stimulus, US) results in full extension of the proboscis (unconditioned response). Proboscis extension tests were conducted as previously described (2) by touching the middle leg with a cotton-tipped applicator soaked in 50% sucrose solution (wt/wt), with slight modifications. Individual butterflies were fed daily with 150  $\mu$ l of a 25% honey solution prior to the experiment. The day prior to stimulus conditioning, individuals were harnessed in 15ml polypropylene conical tubes as previously described (2) and starved for 24 hours. On the day of testing, individuals were checked for a positive proboscis extension reflex. Wild-type monarchs with eyes covered with either clear or black paint, and *ninaB1*  $-/-$  monarchs were conditioned to a colored stimulus (red flag; conditioned stimulus, CS) by presenting the stimulus for 5 sec (CS only), contacting the middle legs with sucrose solution for 15 sec (CS +US), and removing the stimulus after 5 sec (US only). Individuals were then held for 5 min and this pairing procedure was performed again. US-CS pairing continued in this way for 13 to 14 trials a day for three consecutive days until the individual extended its proboscis upon the initial presentation of the CS, in which case a sucrose reward was given. Monarchs were considered to have a positive PER (conditioned response) if they fully extended their proboscis in response to the CS. On the second and third day of testing, butterflies were fed 50  $\mu$ l of a 25% honey solution to prevent extreme starvation.

### **Real-time qPCR**

To test for the presence of a functional circadian clock in *ninaB1* loss-of-function monarchs, brains of adult wild-type and *ninaB1* homozygous mutant monarchs entrained to seven 15:9 LD cycles were dissected under red light on the first day of transfer into DD at circadian time (CT) 0, CT4, CT8, CT12, CT16, and CT20. Dissections were performed in 0.5X RNA later (Invitrogen) to avoid RNA degradation, and brains free of eye photoreceptors were stored at  $-80^{\circ}\text{C}$  until use. Total RNA was extracted using

RNeasy Mini kit (Qiagen), treated with RQ1 Dnase (Promega), and random hexamers (Promega) were used to prime reverse transcription with Superscript II Reverse Transcriptase (Thermo Scientific), all according to the manufacturers' instructions. Quantifications of gene expression were performed on a QuantStudio™ 6 Flex Real-Time PCR System (Thermo Scientific) using iTaq Universal SYBR Green Supermix (Bio-Rad). PCR reactions were assembled by combining two master mixes: the first mix contained 5 µl of iTaq Universal SYBR® Green Supermix (Bio-Rad) and forward and reverse primers (5 µmol each) per reaction and the second mix contained approximately 7 ng of cDNA template and the water needed to bring each reaction to a final volume of 10 µl. The monarch *per* and control *rp49* primers were as follows (F, forward primer; R, reverse primer): *perF*, 5'-AGTGAAGCGTCCCTCAAACA-3'; *perR*, 5'-TGGCGACGAGCATCTGTGT-3'; *rp49F*, 5'-TGCGCAGGCGTTTTAAGG-3'; *rp49R*, 5'-TTGTTTGATCCGTAACCAATGC-3'. The near 100% efficiency of each primer set was validated by determining the slope of Ct versus dilution plot on a dilution series. Individual reactions were used to quantify each RNA level in a given cDNA sample, and the average Ct from duplicated reactions within the same run was used for quantification. The data were normalized to *rp49* as an internal control, and normalized to the mean of one sample within a set for statistics.



## Supplementary Figures

Fig. S1

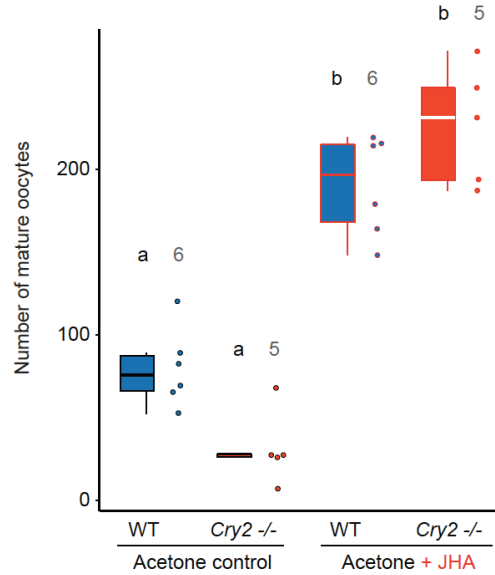

**Fig. S1. Application of a juvenile hormone analogue restores high levels of oocyte production in monarch *Cry2*<sup>-/-</sup>.** Number of mature oocytes produced 10 days post adult emergence in wild-type or *Cry2*<sup>-/-</sup> female monarchs treated with either an acetone vehicle or with methoprene, a juvenile hormone analogue (JHA). Monarch were raised in LP at 25°C. Legends as in Figure 1. Interaction genotype x treatment, Two-way ANOVA, Tukey's pairwise comparisons,  $p < 0.05$ .

**Fig. S2**

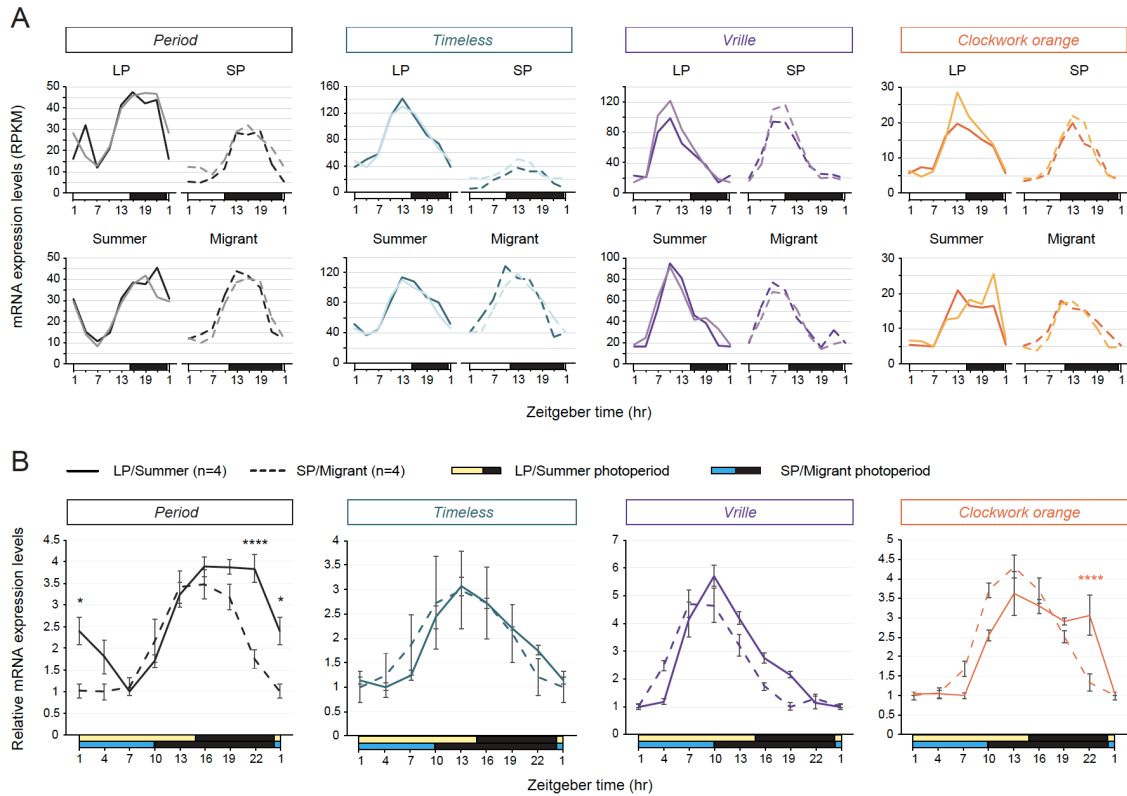

**Fig. S2. Temporal mRNA expression profiles of *period*, *timeless*, *vrille*, and *clockwork orange* in brains of monarchs in different photoperiods.** A) mRNA expression levels in brains of monarchs raised in LP and SP (*top*) and of summer-like and migrant monarchs (*bottom*). For each condition, two biological replicates are plotted. White bars: light; black bars: dark. B) Relative mRNA expression levels from pooled biological replicates of LP and summer-like monarchs (solid line), and SP and migrants (dashed line). Data represent the mean  $\pm$  s.e.m. Yellow bars: long day; blue bars: short day; black bars: dark. Interactions seasonal morph  $\times$  photoperiod, Two-way ANOVAs: *period*,  $p < 0.0001$ ; *timeless*, non significant; *vrille*,  $p < 0.005$ ; *clockwork orange*,  $p < 0.0001$ . Tukey's pairwise comparisons, \*,  $p < 0.05$ ; \*\*\*\*,  $p < 0.0001$ .

**Fig. S3**

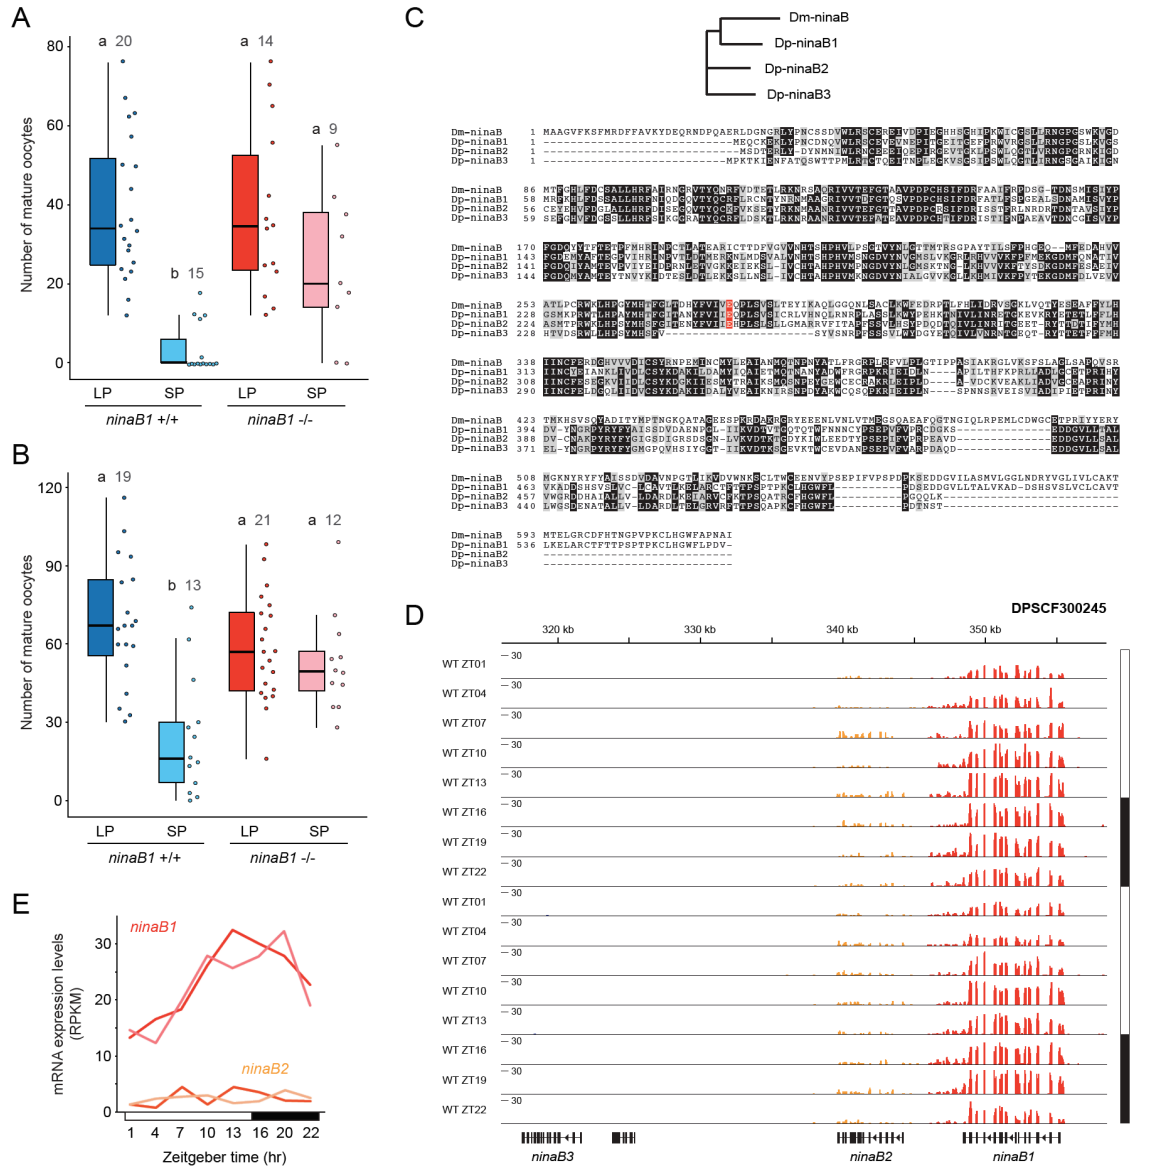

**Fig. S3. The reproductive state exhibited by photoperiod-impaired *ninaB1* loss-of-function could be caused by redundant function of *ninaB1* and *ninaB2*.** (A, B) Number of mature oocytes produced 10 days post adult emergence in *ninaB1* homozygous loss-of-function and wild-type sibling females, all raised in LP and SP at 21 °C after either one backcross (A) or three backcrosses (B). Legends as in Figure 4B. Interaction genotype x photoperiod, Two-way ANOVA, Tukey's pairwise comparisons,  $p < 0.05$ . (C) Comparisons of *Drosophila ninaB* (Dm; AAF54978) and monarch (Dp) *ninaB1* (DPOGS212590), *ninaB2* (DPOGS212591), and *ninaB3* (DPOGS212592) sequences. *Top*, phylogenetic relationship. *Bottom*, sequences alignment. Identical and similar residues found in at least three out of four sequences are shaded in black and gray,

respectively. The glutamic acid residue highlighted in red, which is conserved between Dm-ninaB, Dp-ninaB1 and Dp-ninaB2 but absent in Dp-ninaB3, corresponds to the residue providing the enzymatic activity of Dm-ninaB (18). (D) Visualization of RNA-seq signal in brains of wild-type monarchs over 24 hours in LP on scaffold DPSCF300245 that contains the three copies of *ninaB* present in the monarch genome. Of the two detectable expressed copies, only *ninaB1* displays rhythmic expression. Two biological replicates are plotted consecutively from top to bottom. White bar: light; dark bar: night. (E) mRNA expression levels of *ninaB1* and *ninaB2* in the brain of wild-type monarchs over the course of the day in LP. For each gene, two biological replicates are plotted. White bar: light; black bar.

**Fig. S4**

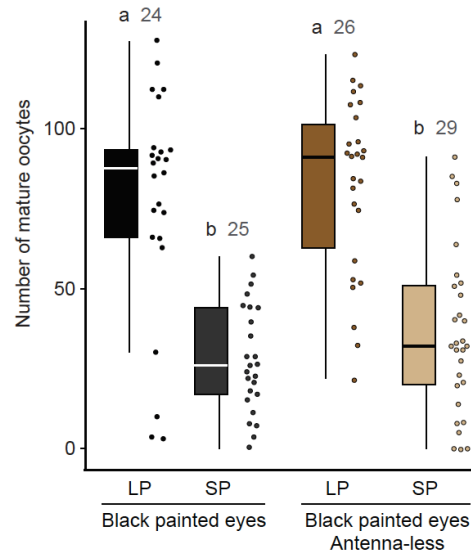

**Fig. S4. The antennae are not necessary for photoperiodic responses.** Number of mature oocytes produced 10 days post adult emergence in wild-type female monarchs with eyes painted black and with or without antennae, all raised in LP and SP at 21°C. Legends as in Figure 4C. Interaction genotype x photoperiod, Two-way ANOVA, Tukey's pairwise comparisons,  $p < 0.05$ .

**Table S1.** List of genes with similar or differential temporal expression patterns in the brain of monarchs raised in LP and SP. R-R: Genes rhythmic in both conditions; R-AR: Genes rhythmic in LP monarchs and arrhythmic in SP monarchs; AR-R: Genes arrhythmic in LP monarchs and rhythmic in SP monarchs. The annotation is based on *Drosophila* (no shading) or mouse (gray shading) orthologues. NA, monarch genes without orthologues in *Drosophila* or the mouse.

| Gene ID     | R-R                                                                  |
|-------------|----------------------------------------------------------------------|
| DPOGS211878 | Cyclin D                                                             |
| DPOGS200190 | similar                                                              |
| DPOGS214070 | stumps                                                               |
| DPOGS205548 | Ubiquitin conjugating enzyme 7                                       |
| DPOGS207780 | multiple edematous wings                                             |
| DPOGS209874 | solute carrier family 2, (facilitated glucose transporter), member 8 |
| DPOGS207730 | CG10082                                                              |
| DPOGS205355 | Ucp4A                                                                |
| DPOGS213007 | Cytochrome P450-18a1                                                 |
| DPOGS207942 | synaptotagmin XI                                                     |
| DPOGS206908 | Glucose dehydrogenase                                                |
| DPOGS205549 | G protein-coupled receptor 158                                       |
| DPOGS205086 | Multidrug-Resistance like Protein 1                                  |
| DPOGS209797 | Vacuolar H <sup>+</sup> ATPase 100kD subunit 2                       |
| DPOGS215479 | monooxygenase, DBH-like 1                                            |
| DPOGS210745 | transmembrane protein 135                                            |
| DPOGS201345 | tocopherol (alpha) transfer protein-like                             |
| DPOGS215439 | lethal (2) essential for life                                        |
| DPOGS211121 | ubiquitin-conjugating enzyme E2Q family-like 1                       |
| DPOGS204644 | phospholipid phosphatase 1                                           |
| DPOGS209511 | solute carrier family 17 (anion/sugar transporter), member 5         |
| DPOGS215865 | THUMP domain containing 1                                            |
| DPOGS213900 | Heat shock protein 68                                                |
| DPOGS208883 | Glycerol 3 phosphate dehydrogenase                                   |
| DPOGS215738 | eiger                                                                |
| DPOGS213901 | Heat shock protein 68                                                |
| DPOGS215489 | 6-phosphofructo-2-kinase                                             |
| DPOGS205929 | sprite                                                               |
| DPOGS202078 | Cyp9f2                                                               |
| DPOGS204253 | calsyntenin 2                                                        |

|             |                                                                         |
|-------------|-------------------------------------------------------------------------|
| DPOGS202178 | Glutamate oxaloacetate transaminase 1                                   |
| DPOGS207058 | choline dehydrogenase                                                   |
| DPOGS215494 | 1,4-Alpha-Glucan Branching Enzyme                                       |
| DPOGS210128 | PAPS synthetase                                                         |
| DPOGS201488 | Mid1 interacting protein 1 (gastrulation specific G12-like (zebrafish)) |
| DPOGS213925 | Heat shock protein 68                                                   |
| DPOGS204642 | GTPase regulator associated with FAK                                    |
| DPOGS205928 | sprite                                                                  |
| DPOGS213114 | Choline transporter-like 2                                              |
| DPOGS205386 | phosphoglucose mutase                                                   |
| DPOGS214409 | solute carrier family 22 (organic cation transporter), member 1         |
| DPOGS201746 | Carbonic anhydrase 1                                                    |
| DPOGS202237 | DnaJ heat shock protein family (Hsp40) member B4                        |
| DPOGS200817 | alkaline phosphatase, liver/bone/kidney                                 |
| DPOGS214695 | meteorin, glial cell differentiation regulator-like                     |
| DPOGS200691 | Enhancer of split mbeta, helix-loop-helix                               |
| DPOGS213804 | Inositol 1,4,5-triphosphate kinase 1                                    |
| DPOGS213896 | Mitf                                                                    |
| DPOGS200684 | Enhancer of split mbeta, helix-loop-helix                               |
| DPOGS200409 | Integrin betanu subunit                                                 |
| DPOGS203128 | argos                                                                   |
| DPOGS210886 | rau                                                                     |
| DPOGS208606 | vriille                                                                 |
| DPOGS201013 | high mobility group box transcription factor 1                          |
| DPOGS205643 | solute carrier family 36 (proton/amino acid symporter), member 4        |
| DPOGS215160 | Trehalose transporter 1-2                                               |
| DPOGS214408 | solute carrier family 22 (organic cation transporter), member 21        |
| DPOGS211073 | cysteine-rich secretory protein 2                                       |
| DPOGS207391 | clavesin 2                                                              |
| DPOGS204091 | Salt-inducible kinase 3                                                 |
| DPOGS215159 | Trehalose transporter 1-1                                               |
| DPOGS215378 | chondroitin sulfate synthase 1                                          |
| DPOGS205105 | ATP binding cassette subfamily G member 4                               |
| DPOGS201012 | Leucine-rich pentatricopeptide repeat containing 2                      |
| DPOGS214162 | Na <sup>+</sup> /H <sup>+</sup> hydrogen antiporter 1                   |
| DPOGS211050 | Insulin-like receptor                                                   |
| DPOGS209785 | Aminolevulinatase synthase                                              |
| DPOGS207504 | Farnesyl pyrophosphate synthase                                         |

|                |                                                                        |
|----------------|------------------------------------------------------------------------|
| DPOGS214179    | timeless                                                               |
| DPOGS209175    | phosphatidylinositol-specific phospholipase C, X domain containing 3   |
| DPOGS203974    | Calcium-dependent secretion activator                                  |
| DPOGS209926    | hattifattener                                                          |
| DPOGS214215    | Na <sup>+</sup> /H <sup>+</sup> hydrogen antiporter 1                  |
| DPOGS205855    | solute carrier family 46, member 3                                     |
| DPOGS200290    | penguin                                                                |
| DPOGS212590    | neither inactivation nor afterpotential B                              |
| DPOGS207444    | phospholipase A2, group III                                            |
| DPOGS201101    | solute carrier family 2 (facilitated glucose transporter), member 6    |
| DPOGS209146    | solute carrier family 22 (organic cation transporter), member 3        |
| DPOGS209925    | clockwork orange                                                       |
| DPOGS211474    | pastrel                                                                |
| DPOGS204463    | Matrix metalloproteinase 1                                             |
| DPOGS213552    | Ecdysone-induced protein 28/29kD                                       |
| DPOGS216102    | lethal (2) k09913                                                      |
| DPOGS201925    | solute carrier family 2, (facilitated glucose transporter), member 8   |
| DPOGS215419    | dumpy                                                                  |
| DPOGS203908    | period                                                                 |
| DPOGS208959    | Vacuolar H <sup>+</sup> ATPase 100kD subunit 2                         |
| DPOGS203797    | Heat shock factor                                                      |
| DPOGS209585    | FCH domain only 2                                                      |
| DPOGS212685    | sarcoplasmic calcium-binding protein                                   |
| DPOGS208406    | CG30069                                                                |
| DPOGS204552    | solute carrier family 2, (facilitated glucose transporter), member 8   |
| <b>Gene ID</b> | <b>R-AR</b>                                                            |
| DPOGS215700    | primo-2                                                                |
| DPOGS207634    | tribbles                                                               |
| DPOGS214920    | Multicopper oxidase-1                                                  |
| DPOGS201668    | short gastrulation                                                     |
| DPOGS205889    | Rab40                                                                  |
| DPOGS202087    | Cytochrome P450-9b2                                                    |
| DPOGS215481    | no mechanoreceptor potential C                                         |
| DPOGS213661    | stearoyl-Coenzyme A desaturase 1                                       |
| DPOGS208470    | CG13272                                                                |
| DPOGS215992    | PDGF- and VEGF-receptor related                                        |
| DPOGS210839    | solute carrier family 16 (monocarboxylic acid transporters), member 14 |



|             |                                                                            |
|-------------|----------------------------------------------------------------------------|
| DPOGS209237 | Slowpoke binding protein                                                   |
| DPOGS206903 | SIK family kinase 3                                                        |
| DPOGS206136 | LON peptidase N-terminal domain and ring finger 2                          |
| DPOGS207671 | branchless                                                                 |
| DPOGS209909 | carboxylesterase 2F                                                        |
| DPOGS214094 | mysospheroid                                                               |
| DPOGS202126 | very low density lipoprotein receptor                                      |
| DPOGS208999 | retinol dehydrogenase 13 (all-trans and 9-cis)                             |
| DPOGS213594 | Glycogen binding subunit 76A                                               |
| DPOGS203211 | Cuticular protein 97Ea                                                     |
| DPOGS201245 | CAP                                                                        |
| DPOGS215826 | solute carrier family 46, member 3                                         |
| DPOGS203379 | periaxin                                                                   |
| DPOGS213639 | xin actin-binding repeat containing 2                                      |
| DPOGS200414 | twist                                                                      |
| DPOGS201544 | Organic anion transporting polypeptide 74D                                 |
| DPOGS203582 | CAP                                                                        |
| DPOGS214692 | phosphoribosyl pyrophosphate synthetase-associated protein 2               |
| DPOGS207676 | lethal (3) 73Ah                                                            |
| DPOGS200195 | transmembrane protein 135                                                  |
| DPOGS212327 | F-box protein 32                                                           |
| DPOGS201486 | windpipe                                                                   |
| DPOGS201894 | Maltase A4                                                                 |
| DPOGS212552 | Cyp9f2                                                                     |
| DPOGS205180 | lipase, member H                                                           |
| DPOGS210627 | carbonic anhydrase 3                                                       |
| DPOGS200316 | globin 1                                                                   |
| DPOGS214402 | Glycogen synthase                                                          |
| DPOGS205764 | U2A                                                                        |
| DPOGS206008 | microtubule associated monooxygenase, calponin and LIM domain containing 3 |
| DPOGS214921 | Multicopper oxidase-1                                                      |
| DPOGS210848 | starvin                                                                    |
| DPOGS204087 | ribbon                                                                     |
| DPOGS210850 | leucine rich repeat containing G protein coupled receptor 5                |
| DPOGS207651 | UDP glucuronosyltransferase 2 family, polypeptide B1                       |
| DPOGS212108 | straw                                                                      |
| DPOGS201241 | CAP                                                                        |

|             |                                                            |
|-------------|------------------------------------------------------------|
| DPOGS204250 | phenazine biosynthesis-like protein domain containing 2    |
| DPOGS207000 | Myosin heavy chain-like                                    |
| DPOGS212996 | Ecdysone-inducible gene E1                                 |
| DPOGS215099 | transmembrane protease, serine 11f                         |
| DPOGS208825 | Protostome-specific GEF                                    |
| DPOGS202077 | Cyp9f2                                                     |
| DPOGS209025 | LIM domain only 7                                          |
| DPOGS207287 | selenium binding protein 1                                 |
| DPOGS207994 | family with sequence similarity 193, member A              |
| DPOGS202356 | mutagen-sensitive 312                                      |
| DPOGS205888 | Serine hydroxymethyltransferase 2                          |
| DPOGS213632 | pallbearer                                                 |
| DPOGS215384 | RIO kinase 2                                               |
| DPOGS208881 | DnaJ-like-2                                                |
| DPOGS200771 | stall                                                      |
| DPOGS215969 | Transaldolase                                              |
| DPOGS202029 | membrane steroid binding protein                           |
| DPOGS205833 | amylo-1,6-glucosidase, 4-alpha-glucanotransferase          |
| DPOGS200067 | Trehalose transporter 1-2                                  |
| DPOGS208971 | leucine rich melanocyte differentiation associated         |
| DPOGS213899 | Heat shock protein 83                                      |
| DPOGS209508 | phosphoglucose mutase                                      |
| DPOGS206382 | lethal (2) essential for life                              |
| DPOGS202781 | Hsp70/Hsp90 organizing protein                             |
| DPOGS203810 | Phosphofructokinase                                        |
| DPOGS210890 | Autophagy-related 3                                        |
| DPOGS214304 | spenito                                                    |
| DPOGS215007 | Brahma associated protein 170kD                            |
| DPOGS215703 | firelighter                                                |
| DPOGS203355 | string                                                     |
| DPOGS210704 | COP9 signalosome subunit 7B                                |
| DPOGS201784 | MEP-1                                                      |
| DPOGS201296 | Cyclic nucleotide-gated ion channel subunit B              |
| DPOGS207433 | dumpy                                                      |
| DPOGS210130 | folliculin interacting protein 2                           |
| DPOGS201291 | Ecdysone-induced protein 93F                               |
| DPOGS209745 | Reversion-inducing-cysteine-rich protein with kazal motifs |

|             |                                                                          |
|-------------|--------------------------------------------------------------------------|
| DPOGS204036 | crowded by cid                                                           |
| DPOGS200075 | Hexokinase A                                                             |
| DPOGS205799 | Desaturase 1                                                             |
| DPOGS205647 | ATP binding cassette subfamily G member 4                                |
| DPOGS202409 | dally-like                                                               |
| DPOGS208054 | ENL/AF9-related                                                          |
| DPOGS211554 | Partner of paired                                                        |
| DPOGS202573 | Phosphoenolpyruvate carboxykinase                                        |
| DPOGS214934 | distal antenna                                                           |
| DPOGS210087 | unc-5                                                                    |
| DPOGS207462 | Beadex                                                                   |
| DPOGS212184 | lysyl oxidase-like 2                                                     |
| DPOGS209609 | MLF1-adaptor molecule                                                    |
| DPOGS203228 | Cln7                                                                     |
| DPOGS203167 | solute carrier family 22 (organic cation transporter), member 3          |
| DPOGS207999 | MYC-associated zinc finger protein (purine-binding transcription factor) |
| DPOGS201447 | Chitin deacetylase-like 5                                                |
| DPOGS202150 | Chondrocyte-derived ezrin-like domain containing protein                 |
| DPOGS202152 | Chondrocyte-derived ezrin-like domain containing protein                 |
| DPOGS211888 | otopetrin 2                                                              |
| DPOGS209166 | Bre1                                                                     |
| DPOGS208905 | kuzbanian                                                                |
| DPOGS201136 | Ecdysone-induced protein 74EF                                            |
| DPOGS202153 | Chondrocyte-derived ezrin-like domain containing protein                 |
| DPOGS200402 | Prosap                                                                   |
| DPOGS205510 | CG42304                                                                  |
| DPOGS208589 | Adherens junction protein p120                                           |
| DPOGS208870 | cadherin 15                                                              |
| DPOGS203088 | solute carrier family 5 (sodium/glucose cotransporter), member 12        |
| DPOGS204939 | fibronectin type III domain containing 5                                 |
| DPOGS210490 | pyroglutamyl-peptidase I                                                 |
| DPOGS203127 | Pyruvate kinase                                                          |
| DPOGS214140 | Fatty acid (long chain) transport protein                                |
| DPOGS206803 | Ubiquitin conjugating enzyme 4                                           |
| DPOGS207157 | Formin homology 2 domain containing                                      |

|             |                                                                                |
|-------------|--------------------------------------------------------------------------------|
| DPOGS202825 | fuseless                                                                       |
| DPOGS205514 | happyhour                                                                      |
| DPOGS200399 | schlank                                                                        |
| DPOGS205915 | folded gastrulation                                                            |
| DPOGS201347 | tocopherol (alpha) transfer protein                                            |
| DPOGS212492 | CG31324                                                                        |
| DPOGS215237 | Mid1                                                                           |
| DPOGS207272 | ADP ribosylation factor-like 4                                                 |
| DPOGS211190 | minidisks                                                                      |
| DPOGS208314 | Mitochondrial pyruvate carrier                                                 |
| DPOGS213044 | mediator complex subunit 14                                                    |
| DPOGS202609 | Acetylcholine esterase                                                         |
| DPOGS208868 | Membrin                                                                        |
| DPOGS209828 | jaguar                                                                         |
| DPOGS214045 | transmembrane and tetratricopeptide repeat containing 2                        |
| DPOGS200370 | discs overgrown                                                                |
| DPOGS214228 | Protein kinase, cAMP-dependent, catalytic subunit 3                            |
| DPOGS216090 | ral guanine nucleotide dissociation stimulator-like 3                          |
| DPOGS210086 | Prp18                                                                          |
| DPOGS205077 | neurotrimin                                                                    |
| DPOGS209183 | sevenless                                                                      |
| DPOGS208166 | Fimbrin                                                                        |
| DPOGS203456 | Fasciclin 3                                                                    |
| DPOGS208790 | proline rich 22                                                                |
| DPOGS203229 | solute carrier family 22 (organic cation transporter), member 3                |
| DPOGS204749 | solute carrier family 22 (organic cation transporter), member 1                |
| DPOGS214622 | BIR repeat containing ubiquitin-conjugating enzyme                             |
| DPOGS203436 | RIKEN cDNA 3425401B19 gene                                                     |
| DPOGS212948 | BCL2/adenovirus E1B interacting protein 3-like                                 |
| DPOGS208674 | GLI pathogenesis-related 2                                                     |
| DPOGS204941 | hexose-6-phosphate dehydrogenase (glucose 1-dehydrogenase)                     |
| DPOGS210475 | Adipokinetic hormone receptor                                                  |
| DPOGS201412 | CG11370                                                                        |
| DPOGS201957 | carboxylesterase 2A                                                            |
| DPOGS209128 | carboxylesterase 4A                                                            |
| DPOGS202827 | scavenger receptor acting in neural tissue and majority of rhodopsin is absent |
| DPOGS203890 | scavenger receptor acting in neural tissue and majority of rhodopsin           |

|                |                                                                                |
|----------------|--------------------------------------------------------------------------------|
|                | is absent                                                                      |
| DPOGS213662    | Pyrokinin 1 receptor                                                           |
| DPOGS214271    | Sodium/solute co-transporter-like 5A11                                         |
| DPOGS213185    | missing-in-metastasis                                                          |
| DPOGS201183    | Peptidoglycan recognition protein LC                                           |
| DPOGS210599    | Cytochrome b5                                                                  |
| DPOGS206439    | glutaryl-Coenzyme A dehydrogenase                                              |
| DPOGS201885    | nervana 2                                                                      |
| DPOGS201896    | NA                                                                             |
| DPOGS208079    | cryptochrome 2                                                                 |
| DPOGS205727    | Glycoprotein hormone alpha 2                                                   |
| DPOGS205014    | red Malpighian tubules                                                         |
| DPOGS202323    | CG12947                                                                        |
| DPOGS206847    | I'm not dead yet                                                               |
| DPOGS215688    | solute carrier family 34 (sodium phosphate), member 1                          |
| DPOGS214174    | RIKEN cDNA 1110008P14 gene                                                     |
| DPOGS202921    | puffeye                                                                        |
| DPOGS213305    | Trehalose transporter 1-2                                                      |
| DPOGS203808    | arc                                                                            |
| DPOGS200805    | Chondrocyte-derived ezrin-like domain containing protein                       |
| DPOGS208132    | CG8854                                                                         |
| DPOGS207346    | NA                                                                             |
| DPOGS208658    | Multiple C2 domain and transmembrane region protein                            |
| <b>Gene ID</b> | <b>AR-R</b>                                                                    |
| DPOGS215693    | Kinesin-like protein at 31E                                                    |
| DPOGS205193    | pita                                                                           |
| DPOGS213910    | dawdle                                                                         |
| DPOGS213990    | Valyl-tRNA synthetase, mitochondrial                                           |
| DPOGS209800    | absent, small, or homeotic discs 2                                             |
| DPOGS204630    | Cytochrome b5                                                                  |
| DPOGS213168    | thickveins                                                                     |
| DPOGS209055    | breast carcinoma amplified sequence 3                                          |
| DPOGS201195    | solute carrier family 7 (cationic amino acid transporter, y+ system), member 2 |
| DPOGS208537    | fritz                                                                          |
| DPOGS213902    | Unc-89                                                                         |
| DPOGS213038    | RNA-binding protein 6                                                          |

|             |                                                                                |
|-------------|--------------------------------------------------------------------------------|
| DPOGS211622 | purine-nucleoside phosphorylase 2                                              |
| DPOGS213604 | family with sequence similarity 205, member A2                                 |
| DPOGS215784 | narrow                                                                         |
| DPOGS215002 | Tetraspanin 97E                                                                |
| DPOGS208998 | ethanolamine phosphate phospholyase                                            |
| DPOGS205152 | Ecdysone-inducible gene L2                                                     |
| DPOGS205265 | sulfotransferase family 2A, dehydroepiandrosterone (DHEA)-preferring, member 6 |
| DPOGS208044 | sodium potassium chloride cotransporter                                        |
| DPOGS210295 | Phosphoglucose isomerase                                                       |
| DPOGS210772 | ubiquitin protein ligase E3 component n-recogin 5                              |
| DPOGS215272 | SET and MYND domain containing, arthropod-specific, member 4                   |
| DPOGS213903 | solute carrier family 2, (facilitated glucose transporter), member 8           |
| DPOGS200764 | wunen                                                                          |
| DPOGS200490 | Malate dehydrogenase 1                                                         |
| DPOGS211592 | Mucin 14A                                                                      |
| DPOGS206048 | mannan-binding lectin serine peptidase 1                                       |
| DPOGS209724 | transmembrane protease, serine 9                                               |
| DPOGS211461 | family with sequence similarity 43, member A                                   |
| DPOGS201483 | Rrp42                                                                          |
| DPOGS213101 | Collagen type IV alpha 1                                                       |
| DPOGS203208 | Novel nucleolar protein 3                                                      |
| DPOGS200182 | Dual oxidase                                                                   |
| DPOGS203734 | Nckx30C                                                                        |
| DPOGS208305 | lethal (1) G0020                                                               |
| DPOGS213282 | zelda                                                                          |
| DPOGS210429 | Rab23                                                                          |
| DPOGS209220 | takeout                                                                        |
| DPOGS209293 | ACAT-related protein required for viability 1                                  |
| DPOGS203267 | ELF1 homolog, elongation factor 1                                              |
| DPOGS209941 | glutamate receptor, ionotropic, kainate 2 (beta 2)                             |
| DPOGS203459 | Sphingosine kinase 1                                                           |
| DPOGS215663 | DIM1 dimethyladenosine transferase 1-like ( <i>S. cerevisiae</i> )             |
| DPOGS213088 | Rrp4                                                                           |
| DPOGS215556 | PSEA-binding protein 95kD                                                      |
| DPOGS210537 | ATP synthase mitochondrial F1 complex assembly factor 1                        |
| DPOGS208596 | geminin                                                                        |
| DPOGS211313 | JNK1/MAPK8-associated membrane protein                                         |

|             |                                                               |
|-------------|---------------------------------------------------------------|
| DPOGS207276 | karyopherin alpha1                                            |
| DPOGS207451 | Glutaminyl-tRNA synthetase                                    |
| DPOGS212326 | tRNA isopentenyltransferase 1                                 |
| DPOGS211640 | dehydrogenase/reductase (SDR family) member 4                 |
| DPOGS202064 | mitochondrial ribosomal protein L32                           |
| DPOGS201773 | Regulatory particle non-ATPase 12                             |
| DPOGS203161 | merry-go-round                                                |
| DPOGS211728 | jitterbug                                                     |
| DPOGS202638 | PWP2 periodic tryptophan protein homolog (yeast)              |
| DPOGS210122 | Phospholipase A2 activator protein                            |
| DPOGS213171 | Mitochondrial trifunctional protein alpha subunit             |
| DPOGS202243 | ribosomal RNA processing 15 homolog ( <i>S. cerevisiae</i> )  |
| DPOGS210477 | Glutathione S transferase D3                                  |
| DPOGS204283 | transmembrane protein 256                                     |
| DPOGS207617 | noisette                                                      |
| DPOGS204316 | Isocitrate dehydrogenase                                      |
| DPOGS213570 | methyltransferase like 22                                     |
| DPOGS201067 | Vacuolar protein sorting 33B                                  |
| DPOGS208233 | Phenylalanyl-tRNA synthetase, beta-subunit                    |
| DPOGS214668 | arsA arsenite transporter, ATP-binding, homolog 1 (bacterial) |
| DPOGS205156 | NAD synthetase                                                |
| DPOGS203689 | ariadne 2                                                     |
| DPOGS203457 | Fasciclin 3                                                   |
| DPOGS206624 | mitochondrial ribosomal protein S2                            |
| DPOGS204467 | rhomboid-7                                                    |
| DPOGS209768 | Signal recognition particle receptor beta                     |
| DPOGS200790 | motile sperm domain containing 2                              |
| DPOGS205949 | GTP-binding protein 10 (putative)                             |
| DPOGS208966 | SPOUT domain containing methyltransferase 1                   |
| DPOGS206283 | beta-4-galactosyltransferase 7                                |
| DPOGS213207 | transmembrane protein 173                                     |
| DPOGS208468 | coiled-coil domain containing 97                              |
| DPOGS209268 | thioredoxin domain containing 9                               |
| DPOGS215730 | kurtz                                                         |
| DPOGS212615 | SLC22A family member                                          |
| DPOGS210816 | nth (endonuclease III)-like 1 ( <i>E.coli</i> )               |
| DPOGS203217 | Chaperonin containing TCP1 subunit 8                          |
| DPOGS207298 | thioredoxin 2                                                 |

|             |                                                                          |
|-------------|--------------------------------------------------------------------------|
| DPOGS214837 | dynein cytoplasmic 2 heavy chain 1                                       |
| DPOGS200566 | RIKEN cDNA 0610037L13 gene                                               |
| DPOGS213209 | URB1 ribosome biogenesis 1 homolog ( <i>S. cerevisiae</i> )              |
| DPOGS211595 | Yip1 domain family, member 7                                             |
| DPOGS200382 | transducin (beta)-like 3                                                 |
| DPOGS214128 | acid phosphatase 2, lysosomal                                            |
| DPOGS201455 | mitochondrial ribosomal protein L42                                      |
| DPOGS206673 | DnaJ heat shock protein family (Hsp40) member C17                        |
| DPOGS213506 | Gdap1                                                                    |
| DPOGS213027 | Obg-like ATPase 1                                                        |
| DPOGS205508 | CCAAT/enhancer binding protein zeta                                      |
| DPOGS200102 | epidermal growth factor receptor pathway substrate 8                     |
| DPOGS207615 | pitchoune                                                                |
| DPOGS213587 | Myb/SANT-like DNA-binding domain containing 3                            |
| DPOGS209577 | Receptor component protein                                               |
| DPOGS213219 | RIO kinase 3                                                             |
| DPOGS215914 | Esa1-associated factor 6                                                 |
| DPOGS210215 | Protoporphyrinogen oxidase                                               |
| DPOGS209063 | taxilin alpha                                                            |
| DPOGS207888 | smg-9 homolog, nonsense mediated mRNA decay factor ( <i>C. elegans</i> ) |
| DPOGS207088 | heterogeneous nuclear ribonucleoprotein H3                               |
| DPOGS203418 | Nucleoporin 107kD                                                        |
| DPOGS215076 | syntaxin 18                                                              |
| DPOGS212345 | small nuclear ribonucleoprotein E                                        |
| DPOGS213025 | Sp1                                                                      |
| DPOGS204880 | COP9 signalosome subunit 1b                                              |
| DPOGS212049 | short coiled-coil protein                                                |
| DPOGS207464 | Mediator complex subunit 7                                               |
| DPOGS212376 | telomerase RNA component interacting RNase                               |
| DPOGS205969 | larsen                                                                   |
| DPOGS216155 | PSEA-binding protein 45kD                                                |
| DPOGS211976 | coiled-coil domain containing 22                                         |
| DPOGS213675 | Bekka                                                                    |
| DPOGS205848 | NAD(P)HX epimerase                                                       |
| DPOGS202592 | DnaJ heat shock protein family (Hsp40) member B2                         |
| DPOGS204859 | mitochondrial ribosomal protein S34                                      |
| DPOGS200836 | Ribosomal RNA processing 40                                              |



|             |                                                                     |
|-------------|---------------------------------------------------------------------|
| DPOGS214256 | Zizimin                                                             |
| DPOGS216147 | solute carrier family 2 (facilitated glucose transporter), member 9 |
| DPOGS201420 | acyl-Coenzyme A oxidase 1, palmitoyl                                |
| DPOGS213908 | ATP-binding cassette, sub-family D (ALD), member 2                  |
| DPOGS215178 | solute carrier organic anion transporter family, member 6c1         |
| DPOGS202770 | ubiquitin protein ligase E3 component n-recognin 7 (putative)       |
| DPOGS213674 | Chaperonin containing TCP1 subunit 4                                |
| DPOGS205058 | Ciao1                                                               |
| DPOGS203048 | FtsJ RNA methyltransferase homolog 3 (E. coli)                      |
| DPOGS205401 | Chaperonin containing TCP1 subunit 3                                |
| DPOGS212825 | transmembrane protein 179                                           |
| DPOGS216039 | dumpy                                                               |
| DPOGS213135 | will die slowly                                                     |
| DPOGS212137 | pescadillo ribosomal biogenesis factor 1                            |
| DPOGS203037 | malectin                                                            |
| DPOGS213133 | mitochondrial ribosomal protein L30                                 |
| DPOGS208977 | Dynactin 6, p27 subunit                                             |
| DPOGS202415 | Glutamyl-tRNA synthetase, mitochondrial                             |
| DPOGS207758 | RNA binding motif protein 19                                        |
| DPOGS212995 | Isocitrate dehydrogenase                                            |
| DPOGS205462 | NA                                                                  |
| DPOGS203662 | Regulator of cullins 2                                              |
| DPOGS207772 | signal sequence receptor, gamma                                     |
| DPOGS201718 | THO complex 2                                                       |
| DPOGS212484 | NA                                                                  |
| DPOGS209419 | zinc finger, MYND-type containing 8                                 |
| DPOGS204681 | Autophagy-related 8a                                                |
| DPOGS209186 | Cadherin 86C                                                        |
| DPOGS207380 | leucine-rich repeats and guanylate kinase domain containing         |
| DPOGS210994 | Cellular Repressor of E1A-stimulated Genes                          |
| DPOGS215977 | Dpr-interacting protein eta                                         |
| DPOGS210673 | Eclosion hormone                                                    |
| DPOGS207305 | ATP binding cassette subfamily G member 4                           |
| DPOGS214673 | Hepatocyte nuclear factor 4                                         |
| DPOGS207246 | Rho guanine nucleotide exchange factor at 64C                       |
| DPOGS202067 | RAS-like, estrogen-regulated, growth-inhibitor                      |
| DPOGS212324 | tRNA isopentenyltransferase 1                                       |
| DPOGS210097 | Limpet                                                              |

|             |                                              |
|-------------|----------------------------------------------|
| DPOGS204377 | beta-1,4-glucuronyltransferase 1             |
| DPOGS215770 | SH2 ankyrin repeat kinase                    |
| DPOGS212331 | lethal (1) G0469                             |
| DPOGS211865 | branched chain aminotransferase 1, cytosolic |
| DPOGS206255 | Chromatin assembly factor 1, p180 subunit    |
| DPOGS212259 | JmjC domain-containing histone demethylase 2 |
| DPOGS203004 | CNMamide Receptor                            |
| DPOGS213560 | nuclear fallout                              |
| DPOGS208273 | erb-b2 receptor tyrosine kinase 3            |
| DPOGS206025 | Peroxidasin                                  |
| DPOGS204181 | Fermitin 1                                   |
| DPOGS211900 | anterior open                                |
| DPOGS206135 | Multi drug resistance 65                     |

**Table S2.** List of genes with similar or differential temporal expression patterns in the brain of summer-like monarchs and wild-caught migrants. R-R: Genes rhythmic in both conditions; R-AR: Genes rhythmic in summer-like monarchs and arrhythmic in migrants; AR-R: Genes arrhythmic in summer-like monarchs and rhythmic in migrants. The annotation is based on *Drosophila* (no shading) or mouse (gray shading) orthologues. NA, monarch genes without orthologues in *Drosophila* or the mouse.

| Gene ID     | R-R                                                                  |
|-------------|----------------------------------------------------------------------|
| DPOGS212327 | F-box protein 32                                                     |
| DPOGS211121 | ubiquitin-conjugating enzyme E2Q family-like 1                       |
| DPOGS204552 | solute carrier family 2, (facilitated glucose transporter), member 8 |
| DPOGS209874 | solute carrier family 2, (facilitated glucose transporter), member 8 |
| DPOGS207730 | CG10082                                                              |
| DPOGS209797 | Vacuolar H[+] ATPase 100kD subunit 2                                 |
| DPOGS206136 | LON peptidase N-terminal domain and ring finger 2                    |
| DPOGS208537 | fritz                                                                |
| DPOGS204644 | phospholipid phosphatase 1                                           |
| DPOGS212996 | Ecdysone-inducible gene E1                                           |
| DPOGS214070 | stumps                                                               |
| DPOGS205823 | polypeptide N-acetylgalactosaminyltransferase 10                     |
| DPOGS215384 | RIO kinase 2                                                         |
| DPOGS200190 | similar                                                              |
| DPOGS205549 | G protein-coupled receptor 158                                       |
| DPOGS212022 | klarsicht                                                            |
| DPOGS210186 | Pyruvate dehydrogenase kinase                                        |
| DPOGS204253 | calsyntenin 2                                                        |
| DPOGS203791 | Semaphorin 1b                                                        |
| DPOGS215738 | eiger                                                                |
| DPOGS202608 | maternal gene required for meiosis                                   |
| DPOGS207058 | choline dehydrogenase                                                |
| DPOGS207000 | Myosin heavy chain-like                                              |
| DPOGS209025 | LIM domain only 7                                                    |
| DPOGS213925 | Heat shock protein 68                                                |
| DPOGS202993 | solute carrier family 36 (proton/amino acid symporter), member 1     |
| DPOGS213900 | Heat shock protein 68                                                |
| DPOGS202607 | maternal gene required for meiosis                                   |
| DPOGS208881 | DnaJ-like-2                                                          |
| DPOGS213901 | Heat shock protein 68                                                |

|             |                                                                      |
|-------------|----------------------------------------------------------------------|
| DPOGS214402 | Glycogen synthase                                                    |
| DPOGS213114 | Choline transporter-like 2                                           |
| DPOGS213326 | CG7110                                                               |
| DPOGS204626 | transmembrane protein 86B                                            |
| DPOGS210128 | PAPS synthetase                                                      |
| DPOGS213327 | predicted gene 973                                                   |
| DPOGS210295 | Phosphoglucose isomerase                                             |
| DPOGS212829 | carboxyesterase 2B                                                   |
| DPOGS207764 | Enolase                                                              |
| DPOGS202781 | Hsp70/Hsp90 organizing protein                                       |
| DPOGS215969 | Transaldolase                                                        |
| DPOGS203810 | Phosphofructokinase                                                  |
| DPOGS205152 | Ecdysone-inducible gene L2                                           |
| DPOGS206692 | pudgy                                                                |
| DPOGS202237 | DnaJ heat shock protein family (Hsp40) member B4                     |
| DPOGS208606 | vriille                                                              |
| DPOGS200811 | hairy                                                                |
| DPOGS215159 | Trehalose transporter 1-1                                            |
| DPOGS209166 | Bre1                                                                 |
| DPOGS201013 | high mobility group box transcription factor 1                       |
| DPOGS215160 | Trehalose transporter 1-2                                            |
| DPOGS201012 | Leucine-rich pentatricopeptide repeat containing 2                   |
| DPOGS203088 | solute carrier family 5 (sodium/glucose cotransporter), member 12    |
| DPOGS212605 | ATP binding cassette subfamily G member 4                            |
| DPOGS209175 | phosphatidylinositol-specific phospholipase C, X domain containing 3 |
| DPOGS214215 | Na <sup>+</sup> /H <sup>+</sup> hydrogen antiporter 1                |
| DPOGS212590 | neither inactivation nor afterpotential B                            |
| DPOGS215394 | NAD-dependent methylenetetrahydrofolate dehydrogenase                |
| DPOGS214162 | Na <sup>+</sup> /H <sup>+</sup> hydrogen antiporter 1                |
| DPOGS214179 | timeless                                                             |
| DPOGS205105 | ATP binding cassette subfamily G member 4                            |
| DPOGS205647 | ATP binding cassette subfamily G member 4                            |
| DPOGS215419 | dumpy                                                                |
| DPOGS209925 | clockwork orange                                                     |
| DPOGS212884 | sushi, nidogen and EGF-like domains 1                                |
| DPOGS203908 | period                                                               |
| DPOGS212885 | Lysine (K)-specific demethylase 2                                    |

|                |                                                                         |
|----------------|-------------------------------------------------------------------------|
| DPOGS207088    | heterogeneous nuclear ribonucleoprotein H3                              |
| DPOGS201668    | short gastrulation                                                      |
| DPOGS213282    | zelda                                                                   |
| DPOGS208079    | cryptochrome 2                                                          |
| DPOGS203797    | Heat shock factor                                                       |
| DPOGS206718    | ArfGAP with SH3 domain, ankyrin repeat and PH domain1                   |
| <b>Gene ID</b> | <b>R-AR</b>                                                             |
| DPOGS206156    | hyaluronoglucosaminidase 2                                              |
| DPOGS201294    | crinkled                                                                |
| DPOGS208747    | cacophony                                                               |
| DPOGS203552    | acyl-CoA synthetase family member 3                                     |
| DPOGS211223    | transcriptional Adaptor 1-1                                             |
| DPOGS212916    | ferric-chelate reductase 1                                              |
| DPOGS210716    | ariadne 2                                                               |
| DPOGS212858    | atlastin                                                                |
| DPOGS215318    | short spindle 7                                                         |
| DPOGS212482    | gemini                                                                  |
| DPOGS211034    | Optic atrophy 1                                                         |
| DPOGS211138    | Ral guanine nucleotide dissociation stimulator-like                     |
| DPOGS209507    | S-adenosylmethionine decarboxylase                                      |
| DPOGS210627    | carbonic anhydrase 3                                                    |
| DPOGS207651    | UDP glucuronosyltransferase 2 family, polypeptide B1                    |
| DPOGS212685    | sarcoplasmic calcium-binding protein                                    |
| DPOGS208406    | CG30069                                                                 |
| DPOGS201345    | tocopherol (alpha) transfer protein-like                                |
| DPOGS201488    | Mid1 interacting protein 1 (gastrulation specific G12-like (zebrafish)) |
| DPOGS215783    | hook                                                                    |
| DPOGS216126    | Gcn5 acetyltransferase                                                  |
| DPOGS207942    | synaptotagmin XI                                                        |
| DPOGS215488    | fatty acid desaturase 1                                                 |
| DPOGS203813    | sphingomyelin phosphodiesterase 1, acid lysosomal                       |
| DPOGS202434    | ebony                                                                   |
| DPOGS211900    | anterior open                                                           |
| DPOGS201894    | Maltase A4                                                              |
| DPOGS209585    | FCH domain only 2                                                       |
| DPOGS208044    | sodium potassium chloride cotransporter                                 |
| DPOGS204181    | Fermitin 1                                                              |

|             |                                                                                |
|-------------|--------------------------------------------------------------------------------|
| DPOGS210257 | ebony                                                                          |
| DPOGS201241 | CAP                                                                            |
| DPOGS205824 | pickled eggs                                                                   |
| DPOGS208999 | retinol dehydrogenase 13 (all-trans and 9-cis)                                 |
| DPOGS201544 | Organic anion transporting polypeptide 74D                                     |
| DPOGS203103 | epithelial membrane protein                                                    |
| DPOGS201445 | integrator complex subunit 13                                                  |
| DPOGS202439 | NA                                                                             |
| DPOGS201195 | solute carrier family 7 (cationic amino acid transporter, y+ system), member 2 |
| DPOGS213560 | nuclear fallout                                                                |
| DPOGS201376 | Neuralized E3 ubiquitin protein ligase 4                                       |
| DPOGS215489 | 6-phosphofructo-2-kinase                                                       |
| DPOGS211148 | unzipped                                                                       |
| DPOGS213546 | dual specificity phosphatase 22                                                |
| DPOGS215479 | monooxygenase, DBH-like 1                                                      |
| DPOGS213594 | Glycogen binding subunit 76A                                                   |
| DPOGS215439 | lethal (2) essential for life                                                  |
| DPOGS201194 | solute carrier family 7 (cationic amino acid transporter, y+ system), member 2 |
| DPOGS212594 | Trehalose-6-phosphate synthase 1                                               |
| DPOGS201446 | CG10527                                                                        |
| DPOGS214041 | beta Spectrin                                                                  |
| DPOGS200407 | midline uncoordinated                                                          |
| DPOGS202602 | Minichromosome maintenance 2                                                   |
| DPOGS200764 | wunen                                                                          |
| DPOGS205265 | sulfotransferase family 2A, dehydroepiandrosterone (DHEA)-preferring, member 6 |
| DPOGS215494 | 1,4-Alpha-Glucan Branching Enzyme                                              |
| DPOGS201573 | cabut                                                                          |
| DPOGS202178 | Glutamate oxaloacetate transaminase 1                                          |
| DPOGS214921 | Multicopper oxidase-1                                                          |
| DPOGS212113 | straw                                                                          |
| DPOGS209035 | transketolase-like 2                                                           |
| DPOGS205929 | sprite                                                                         |
| DPOGS209948 | regucalcin                                                                     |
| DPOGS215720 | Arginine kinase                                                                |
| DPOGS214139 | Fatty acid (long chain) transport protein                                      |
| DPOGS206348 | Picot                                                                          |

|             |                                                           |
|-------------|-----------------------------------------------------------|
| DPOGS213878 | synaptic vesicle glycoprotein 2 b                         |
| DPOGS205027 | Glycogen phosphorylase                                    |
| DPOGS212608 | androgen dependent TFPI regulating protein                |
| DPOGS202126 | very low density lipoprotein receptor                     |
| DPOGS211169 | mitochondrial ribosomal protein L3                        |
| DPOGS212844 | Copper transporter 1A                                     |
| DPOGS200490 | Malate dehydrogenase 1                                    |
| DPOGS200089 | Triose phosphate isomerase                                |
| DPOGS202687 | ATP-binding cassette, sub-family C (CFTR/MRP), member 4   |
| DPOGS208998 | ethanolamine phosphate phospholyase                       |
| DPOGS213690 | beat-IIIc                                                 |
| DPOGS205927 | split ends                                                |
| DPOGS206646 | Salt-inducible kinase 2                                   |
| DPOGS204296 | Poly(ADP-ribose) glycohydrolase                           |
| DPOGS206596 | Megalin                                                   |
| DPOGS205557 | Centromeric protein-C                                     |
| DPOGS207241 | 5-hydroxytryptamine (serotonin) receptor 1A               |
| DPOGS211921 | Myb-interacting protein 130                               |
| DPOGS211191 | Zinc/iron regulated transporter-related protein 71B       |
| DPOGS213064 | Phosphoglycerate kinase                                   |
| DPOGS207671 | branchless                                                |
| DPOGS207964 | CG13024                                                   |
| DPOGS212595 | Trehalose-6-phosphate synthase 1                          |
| DPOGS202111 | Tob                                                       |
| DPOGS215458 | glutathione S-transferase, C-terminal domain containing   |
| DPOGS215868 | family with sequence similarity 107, member B             |
| DPOGS200356 | HEAT repeat containing 2                                  |
| DPOGS208542 | meiotic 9                                                 |
| DPOGS215460 | Glyceraldehyde 3 phosphate dehydrogenase 2                |
| DPOGS201746 | Carbonic anhydrase 1                                      |
| DPOGS208579 | tektin 4                                                  |
| DPOGS214349 | wunen                                                     |
| DPOGS207621 | Leucine-rich-repeats and calponin homology domain protein |
| DPOGS210992 | Mig-2-like                                                |
| DPOGS208578 | Vesicular glutamate transporter                           |
| DPOGS215853 | NMDA receptor 1                                           |
| DPOGS209910 | Sox box protein 14                                        |

|             |                                                                  |
|-------------|------------------------------------------------------------------|
| DPOGS215947 | methyltransferase like 4                                         |
| DPOGS203786 | male fertility factor kl3                                        |
| DPOGS215377 | chondroitin sulfate synthase 1                                   |
| DPOGS213804 | Inositol 1,4,5-triphosphate kinase 1                             |
| DPOGS204494 | metabotropic GABA-B receptor subtype 1                           |
| DPOGS205706 | CG42588                                                          |
| DPOGS200691 | Enhancer of split mbeta, helix-loop-helix                        |
| DPOGS203238 | non-stop                                                         |
| DPOGS212889 | histone PARylation factor 1                                      |
| DPOGS203920 | solute carrier family 36 (proton/amino acid symporter), member 4 |
| DPOGS207222 | roadblock                                                        |
| DPOGS205079 | serine hydrolase-like                                            |
| DPOGS214099 | mannose-P-dolichol utilization defect 1                          |
| DPOGS215591 | THAP domain containing, apoptosis associated protein 2           |
| DPOGS204071 | lactase                                                          |
| DPOGS200817 | alkaline phosphatase, liver/bone/kidney                          |
| DPOGS204091 | Salt-inducible kinase 3                                          |
| DPOGS204153 | Neurochondrin                                                    |
| DPOGS214218 | glycerophosphocholine phosphodiesterase 1                        |
| DPOGS211367 | CoRest                                                           |
| DPOGS202815 | Excitatory amino acid transporter 2                              |
| DPOGS212557 | hippocalcin-like 1                                               |
| DPOGS202145 | Dpr-interacting protein gamma                                    |
| DPOGS202879 | Nucleoporin at 44A                                               |
| DPOGS203017 | Ataxin-2                                                         |
| DPOGS213275 | chondroadherin                                                   |
| DPOGS215237 | Mid1                                                             |
| DPOGS207224 | pudgy                                                            |
| DPOGS202306 | kon-tiki                                                         |
| DPOGS205911 | Vacuolar protein sorting 20                                      |
| DPOGS204363 | kekkon-2                                                         |
| DPOGS212492 | CG31324                                                          |
| DPOGS214212 | c12.1                                                            |
| DPOGS204463 | Matrix metalloproteinase 1                                       |
| DPOGS212989 | POC1 centriolar protein A                                        |
| DPOGS203710 | major facilitator superfamily domain containing 12               |
| DPOGS206978 | nessun dorma                                                     |
| DPOGS214045 | transmembrane and tetratricopeptide repeat containing 2          |



|             |                                                                                |
|-------------|--------------------------------------------------------------------------------|
| DPOGS202609 | Acetylcholine esterase                                                         |
| DPOGS205855 | solute carrier family 46, member 3                                             |
| DPOGS207157 | Formin homology 2 domain containing                                            |
| DPOGS200409 | Integrin betanu subunit                                                        |
| DPOGS214408 | solute carrier family 22 (organic cation transporter), member 21               |
| DPOGS214262 | zinc finger protein 27                                                         |
| DPOGS205964 | Ubiquitin specific protease 20/33                                              |
| DPOGS203155 | Cullin 5                                                                       |
| DPOGS213576 | Hexosaminidase 2                                                               |
| DPOGS211174 | Cwc25                                                                          |
| DPOGS200295 | dachshund family transcription factor 2                                        |
| DPOGS205353 | Mystery 45A                                                                    |
| DPOGS213527 | Zinc/iron regulated transporter-related protein 48C                            |
| DPOGS203890 | scavenger receptor acting in neural tissue and majority of rhodopsin is absent |
| DPOGS203868 | solute carrier family 36 (proton/amino acid symporter), member 4               |
| DPOGS202827 | scavenger receptor acting in neural tissue and majority of rhodopsin is absent |
| DPOGS200883 | CG16791                                                                        |
| DPOGS203228 | Cln7                                                                           |
| DPOGS201881 | nervana 1                                                                      |
| DPOGS201625 | 3-hydroxybutyrate dehydrogenase, type 2                                        |
| DPOGS213552 | Ecdysone-induced protein 28/29kD                                               |
| DPOGS209521 | Fumarylacetoacetase                                                            |
| DPOGS215624 | Glutaminase                                                                    |
| DPOGS200617 | Runt related B                                                                 |
| DPOGS200157 | Rab5                                                                           |
| DPOGS215437 | Pyrroline-5-carboxylate reductase-like 2                                       |
| DPOGS214155 | DEAH (Asp-Glu-Ala-His) box polypeptide 33                                      |
| DPOGS207405 | Protein 1 of cleavage and polyadenylation factor 1                             |
| DPOGS205442 | king tubby                                                                     |
| DPOGS209063 | taxilin alpha                                                                  |
| DPOGS205077 | neurotrimin                                                                    |
| DPOGS207714 | astray                                                                         |
| DPOGS208868 | Membrin                                                                        |
| DPOGS200168 | Tetraspanin 29Fa                                                               |
| DPOGS206850 | pantothenate kinase 3                                                          |
| DPOGS209776 | Ugt86Di                                                                        |

|                |                                                                     |
|----------------|---------------------------------------------------------------------|
| DPOGS209371    | choline dehydrogenase                                               |
| DPOGS206851    | CG17162                                                             |
| DPOGS205076    | kirre like nephrin family adhesion molecule 1                       |
| DPOGS212748    | scheggia                                                            |
| DPOGS200091    | rotatin                                                             |
| DPOGS204998    | Ccp84Ae                                                             |
| DPOGS207585    | tropomyosin 1, alpha                                                |
| DPOGS202068    | Ras-related protein interacting with calmodulin                     |
| DPOGS203923    | lethal (1) G0289                                                    |
| DPOGS208959    | Vacuolar H[+] ATPase 100kD subunit 2                                |
| DPOGS202283    | pre-mRNA processing factor 39                                       |
| DPOGS206412    | endoplasmic reticulum metallopeptidase 1                            |
| DPOGS201651    | Negative Cofactor 2alpha                                            |
| DPOGS209186    | Cadherin 86C                                                        |
| DPOGS201463    | defective proventriculus                                            |
| DPOGS209864    | jim                                                                 |
| DPOGS207448    | Bestrophin 1                                                        |
| DPOGS214570    | Melanization Protease 1                                             |
| DPOGS213793    | vermilion                                                           |
| DPOGS208231    | kallikrein related-peptidase 13                                     |
| DPOGS208188    | Semaphorin 5c                                                       |
| DPOGS201845    | wing blister                                                        |
| DPOGS207077    | sperm antigen with calponin homology and coiled-coil domains 1-like |
| DPOGS205727    | Glycoprotein hormone alpha 2                                        |
| DPOGS209262    | peroxidasin                                                         |
| DPOGS212060    | Fanconi anemia, complementation group M                             |
| DPOGS214879    | prune                                                               |
| DPOGS200824    | zinc finger CCCH type containing 14                                 |
| DPOGS200985    | Leucine-rich repeat-containing G protein-coupled receptor 1         |
| DPOGS203808    | arc                                                                 |
| DPOGS213355    | lipase, member I                                                    |
| DPOGS213007    | Cytochrome P450-18a1                                                |
| <b>Gene ID</b> | <b>AR-R</b>                                                         |
| DPOGS210620    | miranda                                                             |
| DPOGS210559    | NA                                                                  |
| DPOGS214770    | testis expressed gene 2                                             |
| DPOGS205355    | Ucp4A                                                               |

|             |                                                                      |
|-------------|----------------------------------------------------------------------|
| DPOGS206716 | mind-meld                                                            |
| DPOGS215438 | cell division cycle 14                                               |
| DPOGS200105 | Purine-rich binding protein-alpha                                    |
| DPOGS213926 | lethal (2) essential for life                                        |
| DPOGS215242 | chico                                                                |
| DPOGS207729 | centromere protein I                                                 |
| DPOGS205032 | predicted gene 5141                                                  |
| DPOGS212156 | lola like                                                            |
| DPOGS207552 | Mitogen-activated protein kinase phosphatase 3                       |
| DPOGS206443 | gamma-glutamyltransferase 1                                          |
| DPOGS212331 | lethal (1) G0469                                                     |
| DPOGS203967 | Glucose transporter 1                                                |
| DPOGS213347 | rudimentary-like                                                     |
| DPOGS204413 | F-box and leucine-rich repeat protein 6                              |
| DPOGS214030 | mulet                                                                |
| DPOGS210848 | starvin                                                              |
| DPOGS205386 | phosphoglucose mutase                                                |
| DPOGS206473 | solute carrier family 2, (facilitated glucose transporter), member 8 |
| DPOGS210324 | weary                                                                |
| DPOGS209591 | outspread                                                            |
| DPOGS202650 | jing                                                                 |
| DPOGS211108 | BRWD3                                                                |
| DPOGS207955 | Tissue inhibitor of metalloproteases                                 |
| DPOGS211622 | purine-nucleoside phosphorylase 2                                    |
| DPOGS215723 | Zinc finger CCHC-type containing 7                                   |
| DPOGS208796 | transmembrane protease, serine 2                                     |
| DPOGS205218 | eukaryotic translation release factor 1                              |
| DPOGS200508 | zinc finger protein 85                                               |
| DPOGS209575 | HECT, C2 and WW domain containing E3 ubiquitin protein ligase 2      |
| DPOGS216018 | RIKEN cDNA 5031439G07 gene                                           |
| DPOGS202658 | laminin, alpha 3                                                     |
| DPOGS213604 | family with sequence similarity 205, member A2                       |
| DPOGS213632 | pallbearer                                                           |
| DPOGS203702 | naked cuticle                                                        |
| DPOGS205398 | rha                                                                  |
| DPOGS207508 | forked                                                               |
| DPOGS215797 | nicotinate phosphoribosyltransferase                                 |
| DPOGS215758 | Transportin                                                          |

|             |                                                                                |
|-------------|--------------------------------------------------------------------------------|
| DPOGS205469 | G patch domain containing 2 like                                               |
| DPOGS206880 | aldehyde dehydrogenase 1 family, member L1                                     |
| DPOGS205541 | CD68 antigen                                                                   |
| DPOGS211133 | phosphorylase kinase beta                                                      |
| DPOGS213985 | XRCC1                                                                          |
| DPOGS204403 | solute carrier family 7 (cationic amino acid transporter, y+ system), member 9 |
| DPOGS209508 | phosphoglucose mutase                                                          |
| DPOGS206382 | lethal (2) essential for life                                                  |
| DPOGS211598 | Peroxidase                                                                     |
| DPOGS205122 | pollux                                                                         |
| DPOGS212285 | PNN interacting serine/arginine-rich                                           |
| DPOGS207495 | real-time                                                                      |
| DPOGS205231 | protease, serine 30                                                            |
| DPOGS201368 | ER degradation enhancer, mannosidase alpha-like 2                              |
| DPOGS205510 | CG42304                                                                        |
| DPOGS211989 | family with sequence similarity 98, member A                                   |
| DPOGS203197 | pasiflora 2                                                                    |
| DPOGS212041 | heartless                                                                      |
| DPOGS210450 | glycine-N-acyltransferase-like 3                                               |
| DPOGS213101 | Collagen type IV alpha 1                                                       |
| DPOGS209745 | Reversion-inducing-cysteine-rich protein with kazal motifs                     |
| DPOGS202664 | membrane steroid binding protein                                               |
| DPOGS215931 | Aldehyde dehydrogenase type III                                                |
| DPOGS207783 | Dual oxidase                                                                   |
| DPOGS213914 | solute carrier family 2, (facilitated glucose transporter), member 8           |
| DPOGS200925 | CG13643                                                                        |
| DPOGS210130 | folliculin interacting protein 2                                               |
| DPOGS208609 | Adh transcription factor 1                                                     |
| DPOGS214409 | solute carrier family 22 (organic cation transporter), member 1                |
| DPOGS215544 | zinc finger, FYVE domain containing 28                                         |
| DPOGS206919 | lethal (1) G0196                                                               |
| DPOGS201015 | Sterol carrier protein X-related thiolase                                      |
| DPOGS206369 | Mediator complex subunit 27                                                    |
| DPOGS214271 | Sodium/solute co-transporter-like 5A11                                         |
| DPOGS207312 | Src oncogene at 64B                                                            |
| DPOGS208891 | Relish                                                                         |
| DPOGS213513 | lethal (3) 72Dn                                                                |

|             |                                                                 |
|-------------|-----------------------------------------------------------------|
| DPOGS204840 | ecto-NOX disulfide-thiol exchanger 1                            |
| DPOGS212145 | Adenosine receptor                                              |
| DPOGS210680 | Kallmann syndrome 1                                             |
| DPOGS214160 | Na <sup>+</sup> /H <sup>+</sup> hydrogen antiporter 1           |
| DPOGS211339 | N(alpha)-acetyltransferase 20 A                                 |
| DPOGS206184 | mitochondrial ribosomal protein L35                             |
| DPOGS203649 | Integrator 6                                                    |
| DPOGS210429 | Rab23                                                           |
| DPOGS202082 | lectin, mannose-binding 2-like                                  |
| DPOGS200944 | Required for cell differentiation 1                             |
| DPOGS207391 | clavesin 2                                                      |
| DPOGS207599 | mitochondrial ribosomal protein L55                             |
| DPOGS205264 | aldehyde dehydrogenase 18 family, member A1                     |
| DPOGS209146 | solute carrier family 22 (organic cation transporter), member 3 |
| DPOGS207504 | Farnesyl pyrophosphate synthase                                 |
| DPOGS208519 | Usf                                                             |
| DPOGS203115 | Tyrosyl-tRNA synthetase                                         |
| DPOGS205880 | RIKEN cDNA 1110038F14 gene                                      |
| DPOGS207273 | Histone deacetylase 1                                           |
| DPOGS207041 | BUD23, rRNA methyltransferase and ribosome maturation factor    |
| DPOGS215524 | Glutathione Synthetase                                          |
| DPOGS202243 | ribosomal RNA processing 15 homolog ( <i>S. cerevisiae</i> )    |
| DPOGS213269 | amidohydrolase domain containing 2                              |
| DPOGS209232 | Replication factor C 38kD subunit                               |
| DPOGS201279 | clavesin 1                                                      |
| DPOGS205906 | gem nuclear organelle associated protein 7                      |
| DPOGS206662 | N(alpha)-acetyltransferase 38, NatC auxiliary subunit           |
| DPOGS203217 | Chaperonin containing TCP1 subunit 8                            |
| DPOGS200290 | penguin                                                         |
| DPOGS210994 | Cellular Repressor of E1A-stimulated Genes                      |
| DPOGS209768 | Signal recognition particle receptor beta                       |
| DPOGS206466 | PTC7 protein phosphatase homolog                                |
| DPOGS214393 | Glia maturation factor                                          |
| DPOGS204523 | eukaryotic translation initiation factor 2 subunit alpha        |
| DPOGS202974 | MAP kinase activated protein-kinase-2                           |
| DPOGS213401 | Origin recognition complex subunit 5                            |
| DPOGS215555 | Minichromosome maintenance 6                                    |

|             |                                                                  |
|-------------|------------------------------------------------------------------|
| DPOGS201992 | x16 splicing factor                                              |
| DPOGS205993 | Malignant T cell amplified sequence 1                            |
| DPOGS202915 | Signal peptide peptidase                                         |
| DPOGS206597 | Fasciclin 2                                                      |
| DPOGS203773 | M-phase phosphoprotein 10 (U3 small nucleolar ribonucleoprotein) |
| DPOGS212221 | NOP2-Sun domain family, member 2                                 |
| DPOGS201325 | mitochondrial translation elongation factor Ts                   |
| DPOGS207501 | Actin-related protein 3                                          |
| DPOGS206108 | Dodeca-satellite-binding protein 1                               |
| DPOGS207351 | PIN2/TERF1 interacting, telomerase inhibitor 1                   |
| DPOGS207279 | NA                                                               |
| DPOGS216037 | Rho GTPase activating protein at 68F                             |
| DPOGS214375 | Dihydropteridine reductase                                       |
| DPOGS200286 | Regulatory particle non-ATPase 10                                |
| DPOGS205508 | CCAAT/enhancer binding protein zeta                              |
| DPOGS211776 | rush hour                                                        |
| DPOGS214580 | NOP10 ribonucleoprotein                                          |
| DPOGS204316 | Isocitrate dehydrogenase                                         |
| DPOGS208154 | uridine phosphorylase 1                                          |
| DPOGS203757 | Asparagine synthetase                                            |
| DPOGS211134 | Proteasome beta2 subunit                                         |
| DPOGS200182 | Dual oxidase                                                     |
| DPOGS212387 | sans fille                                                       |
| DPOGS207188 | Glutamate receptor IB                                            |
| DPOGS215227 | Cyclin-dependent kinase subunit 85A                              |
| DPOGS213746 | Proteasome alpha6 subunit                                        |
| DPOGS200285 | Mesencephalic astrocyte-derived neurotrophic factor              |
| DPOGS214164 | Sec61 beta subunit                                               |
| DPOGS209926 | hattifattener                                                    |
| DPOGS211106 | chickadee                                                        |
| DPOGS211051 | FER tyrosine kinase                                              |
| DPOGS202316 | optic atrophy 3                                                  |
| DPOGS204777 | Sec61 gamma subunit                                              |
| DPOGS212707 | potassium channel, subfamily K, member 18                        |
| DPOGS209613 | tiptop                                                           |
| DPOGS213650 | coiled-coil serine rich 2                                        |
| DPOGS207200 | His1:CG33861                                                     |

|             |                                                        |
|-------------|--------------------------------------------------------|
| DPOGS208768 | Jrk-like                                               |
| DPOGS212261 | Kaz1-ORFB                                              |
| DPOGS204192 | Glutamyl-prolyl-tRNA synthetase                        |
| DPOGS203404 | highwire                                               |
| DPOGS202523 | Dynein heavy chain 64C                                 |
| DPOGS209960 | Vacuolar protein sorting 13                            |
| DPOGS209394 | protein arginine N-methyltransferase 2                 |
| DPOGS213134 | HECT and RLD domain containing protein 2               |
| DPOGS212667 | CG8740                                                 |
| DPOGS201500 | PAS kinase                                             |
| DPOGS207418 | rugose                                                 |
| DPOGS205736 | endosomal maturation defective                         |
| DPOGS210906 | myopic                                                 |
| DPOGS203769 | Ca <sup>2+</sup> -channel protein alpha[[1]] subunit D |
| DPOGS204111 | sodium channel, voltage-gated, type X, alpha           |
| DPOGS206600 | radish                                                 |
| DPOGS204827 | unc-13                                                 |
| DPOGS211160 | Piezo                                                  |
| DPOGS205809 | blue cheese                                            |
| DPOGS205030 | Rap GTPase activating protein 1                        |
| DPOGS204823 | lymphocyte specific 1                                  |
| DPOGS208356 | DEAH (Asp-Glu-Ala-His) box polypeptide 35              |
| DPOGS210629 | APC-like                                               |
| DPOGS212969 | ring finger protein 144A                               |
| DPOGS207346 | NA                                                     |
| DPOGS209535 | meiosis specific with coiled-coil domain               |
| DPOGS203506 | CG15894                                                |
| DPOGS216202 | castor                                                 |
| DPOGS206932 | RIM-binding protein                                    |
| DPOGS212524 | NA                                                     |
| DPOGS205581 | Cullin 1                                               |
| DPOGS206816 | CG4658                                                 |
| DPOGS207452 | Rab3 GDP-GTP exchange factor                           |
| DPOGS210020 | inositol polyphosphate-5-phosphatase F                 |
| DPOGS215603 | rapamycin-insensitive companion of Tor                 |
| DPOGS211143 | WD repeat domain 59                                    |
| DPOGS206164 | Brahma associated protein 170kD                        |
| DPOGS212332 | Adenylyl cyclase 76E                                   |

|             |                                                                                       |
|-------------|---------------------------------------------------------------------------------------|
| DPOGS206043 | ftz transcription factor 1                                                            |
| DPOGS209239 | zinc finger and BTB domain containing 40                                              |
| DPOGS204972 | ring finger protein 165                                                               |
| DPOGS201030 | Marcal1                                                                               |
| DPOGS207938 | still life                                                                            |
| DPOGS203622 | meiosis regulator and mRNA stability 1                                                |
| DPOGS209769 | septin interacting protein 1                                                          |
| DPOGS206403 | nicotinic Acetylcholine Receptor alpha6                                               |
| DPOGS205084 | RNA-binding Fox protein 1                                                             |
| DPOGS203803 | c-Maf inducing protein                                                                |
| DPOGS200827 | Formin-like                                                                           |
| DPOGS202986 | Gigyf                                                                                 |
| DPOGS203978 | predicted gene 11639                                                                  |
| DPOGS209780 | family with sequence similarity 160, member B1                                        |
| DPOGS204256 | tramtrack                                                                             |
| DPOGS204257 | tramtrack                                                                             |
| DPOGS214346 | wunen                                                                                 |
| DPOGS215331 | Ecdysone-induced protein 74EF                                                         |
| DPOGS201750 | grappa                                                                                |
| DPOGS202907 | centrosomal protein 162                                                               |
| DPOGS203253 | Hepatocyte growth factor regulated tyrosine kinase substrate                          |
| DPOGS201547 | X11Lbeta                                                                              |
| DPOGS213525 | Shaker cognate b                                                                      |
| DPOGS202684 | Wnk kinase                                                                            |
| DPOGS212980 | armadillo repeat containing 8                                                         |
| DPOGS211471 | collagen, type XXIII, alpha 1                                                         |
| DPOGS201244 | CAP                                                                                   |
| DPOGS202471 | pseudouridylate synthase 7                                                            |
| DPOGS211197 | SET domain containing 1A                                                              |
| DPOGS203274 | Rho GTPase activating protein at 100F                                                 |
| DPOGS214481 | Wnk kinase                                                                            |
| DPOGS204391 | female sterile (1) homeotic                                                           |
| DPOGS207677 | R3H domain and coiled-coil containing 1 like                                          |
| DPOGS211802 | skywalker                                                                             |
| DPOGS206516 | proteoglycan 4 (megakaryocyte stimulating factor, articular superficial zone protein) |
| DPOGS201245 | CAP                                                                                   |
| DPOGS208933 | Nna1 carboxypeptidase                                                                 |



|             |                                       |
|-------------|---------------------------------------|
| DPOGS211301 | Synaptosomal-associated protein 25kDa |
| DPOGS205950 | lethal (3) malignant brain tumor      |
| DPOGS212207 | pinstripe                             |
| DPOGS202457 | PDGF- and VEGF-receptor related       |

**Table S3.** List of genes with similar temporal expression patterns in the brains of monarchs raised in LP and in summer-like monarchs and/or in the brains of monarchs raised in SP and in wild-caught migrants. R-R: Genes rhythmic in all four conditions; R-AR: Genes rhythmic in LP and summer-like monarchs, and arrhythmic in SP monarchs and migrants ; AR-R: Genes arrhythmic in LP and summer-like monarchs, and rhythmic in SP monarchs and migrants. The annotation is based on *Drosophila* (no shading) or mouse (colored shading) orthologues. NA, monarch genes without orthologues in *Drosophila* or the mouse.

| Gene ID     | R-R                                                                  |
|-------------|----------------------------------------------------------------------|
| DPOGS200190 | similar                                                              |
| DPOGS201012 | Leucine-rich pentatricopeptide repeat containing 2                   |
| DPOGS201013 | high mobility group box transcription factor 1                       |
| DPOGS202237 | DnaJ heat shock protein family (Hsp40) member B4                     |
| DPOGS203797 | Heat shock factor                                                    |
| DPOGS203908 | period                                                               |
| DPOGS204253 | calsyntenin 2                                                        |
| DPOGS204552 | solute carrier family 2, (facilitated glucose transporter), member 8 |
| DPOGS204644 | phospholipid phosphatase 1                                           |
| DPOGS205105 | ATP binding cassette subfamily G member 4                            |
| DPOGS205549 | G protein-coupled receptor 158                                       |
| DPOGS207058 | choline dehydrogenase                                                |
| DPOGS207730 | CG10082                                                              |
| DPOGS208606 | vriille                                                              |
| DPOGS209175 | phosphatidylinositol-specific phospholipase C, X domain containing 3 |
| DPOGS209797 | Vacuolar H <sup>+</sup> ATPase 100kD subunit 2                       |
| DPOGS209874 | solute carrier family 2, (facilitated glucose transporter), member 8 |
| DPOGS209925 | clockwork orange                                                     |
| DPOGS210128 | PAPS synthetase                                                      |
| DPOGS211121 | ubiquitin-conjugating enzyme E2Q family-like 1                       |
| DPOGS212590 | neither inactivation nor afterpotential B                            |
| DPOGS213114 | Choline transporter-like 2                                           |
| DPOGS213900 | Heat shock protein 68                                                |
| DPOGS213901 | Heat shock protein 68                                                |
| DPOGS213925 | Heat shock protein 68                                                |
| DPOGS214070 | stumps                                                               |
| DPOGS214162 | Na <sup>+</sup> /H <sup>+</sup> hydrogen antiporter 1                |
| DPOGS214179 | timeless                                                             |

|                |                                                                                |
|----------------|--------------------------------------------------------------------------------|
| DPOGS214215    | Na <sup>+</sup> /H <sup>+</sup> hydrogen antiporter 1                          |
| DPOGS215159    | Trehalose transporter 1-1                                                      |
| DPOGS215160    | Trehalose transporter 1-2                                                      |
| DPOGS215419    | dumpy                                                                          |
| DPOGS215738    | eiger                                                                          |
| <b>Gene ID</b> | <b>R-AR</b>                                                                    |
| DPOGS201241    | CAP                                                                            |
| DPOGS201544    | Organic anion transporting polypeptide 74D                                     |
| DPOGS201894    | Maltase A4                                                                     |
| DPOGS202126    | very low density lipoprotein receptor                                          |
| DPOGS202609    | Acetylcholine esterase                                                         |
| DPOGS202827    | scavenger receptor acting in neural tissue and majority of rhodopsin is absent |
| DPOGS203228    | Cln7                                                                           |
| DPOGS203808    | arc                                                                            |
| DPOGS203890    | scavenger receptor acting in neural tissue and majority of rhodopsin is absent |
| DPOGS205077    | neurotrimin                                                                    |
| DPOGS205727    | Glycoprotein hormone alpha 2                                                   |
| DPOGS207157    | Formin homology 2 domain containing                                            |
| DPOGS207651    | UDP glucuronosyltransferase 2 family, polypeptide B1                           |
| DPOGS207671    | branchless                                                                     |
| DPOGS208868    | Membrin                                                                        |
| DPOGS208999    | retinol dehydrogenase 13 (all-trans and 9-cis)                                 |
| DPOGS210627    | carbonic anhydrase 3                                                           |
| DPOGS212492    | CG31324                                                                        |
| DPOGS213594    | Glycogen binding subunit 76A                                                   |
| DPOGS214045    | transmembrane and tetratricopeptide repeat containing 2                        |
| DPOGS214921    | Multicopper oxidase-1                                                          |
| DPOGS215237    | Mid1                                                                           |
| <b>Gene ID</b> | <b>AR-R</b>                                                                    |
| DPOGS200182    | Dual oxidase                                                                   |
| DPOGS202243    | ribosomal RNA processing 15 homolog ( <i>S. cerevisiae</i> )                   |
| DPOGS203217    | Chaperonin containing TCP1 subunit 8                                           |
| DPOGS204316    | Isocitrate dehydrogenase                                                       |
| DPOGS205508    | CCAAT/enhancer binding protein zeta                                            |
| DPOGS209768    | Signal recognition particle receptor beta                                      |
| DPOGS210429    | Rab23                                                                          |
| DPOGS210994    | Cellular Repressor of E1A-stimulated Genes                                     |

|             |                                                |
|-------------|------------------------------------------------|
| DPOGS211622 | purine-nucleoside phosphorylase 2              |
| DPOGS212331 | lethal (1) G0469                               |
| DPOGS213101 | Collagen type IV alpha 1                       |
| DPOGS213604 | family with sequence similarity 205, member A2 |

**Table S4.** RNA-seq mapping summary for LP, SP, summer-like (summer), and migrant monarchs. R: replicate.

| <b>Samples</b> | <b>Number of reads</b> | <b>Mapped reads</b> | <b>Mapping percentage</b> |
|----------------|------------------------|---------------------|---------------------------|
| LP ZT01 R1     | 13,522,929             | 12,569,145          | 92.9                      |
| LP ZT01 R2     | 13,678,471             | 12,641,190          | 92.4                      |
| LP ZT04 R1     | 15,821,730             | 14,679,157          | 92.8                      |
| LP ZT04 R2     | 16,370,285             | 15,082,230          | 92.1                      |
| LP ZT07 R1     | 18,287,614             | 16,960,023          | 92.7                      |
| LP ZT07 R2     | 18,547,268             | 17,043,095          | 91.9                      |
| LP ZT10 R1     | 13,373,316             | 12,350,949          | 92.4                      |
| LP ZT10 R2     | 16,462,573             | 15,232,242          | 92.5                      |
| LP ZT13 R1     | 15,378,742             | 14,253,836          | 92.7                      |
| LP ZT13 R2     | 18,124,188             | 16,640,088          | 91.8                      |
| LP ZT16 R1     | 16,141,542             | 14,943,063          | 92.6                      |
| LP ZT16 R2     | 17,448,980             | 15,981,062          | 91.6                      |
| LP ZT19 R1     | 14,581,672             | 13,501,921          | 92.6                      |
| LP ZT19 R2     | 15,306,522             | 14,013,930          | 91.6                      |
| LP ZT22 R1     | 15,207,486             | 14,104,449          | 92.7                      |
| LP ZT22 R2     | 16,168,931             | 14,936,831          | 92.4                      |
| SP ZT01 R1     | 10,939,912             | 10,068,478          | 92                        |
| SP ZT01 R2     | 11,026,339             | 10,288,670          | 93.3                      |
| SP ZT04 R1     | 11,957,374             | 11,060,333          | 92.5                      |
| SP ZT04 R2     | 11,984,004             | 11,214,567          | 93.6                      |
| SP ZT07 R1     | 14,661,160             | 13,598,461          | 92.8                      |
| SP ZT07 R2     | 11,503,579             | 10,754,899          | 93.5                      |
| SP ZT10 R1     | 11,591,287             | 10,850,911          | 93.6                      |
| SP ZT10 R2     | 11,747,485             | 10,928,317          | 93                        |
| SP ZT13 R1     | 13,794,223             | 12,895,039          | 93.5                      |
| SP ZT13 R2     | 11,163,015             | 10,402,241          | 93.2                      |
| SP ZT16 R1     | 12,703,894             | 11,832,060          | 93.1                      |
| SP ZT16 R2     | 12,174,241             | 11,372,549          | 93.4                      |
| SP ZT19 R1     | 11,931,961             | 11,165,608          | 93.6                      |
| SP ZT19 R2     | 11,276,364             | 10,498,869          | 93.1                      |
| SP ZT22 R1     | 9,356,277              | 8,741,841           | 93.4                      |
| SP ZT22 R2     | 9,315,476              | 8,698,696           | 93.4                      |
| Summer ZT01 R1 | 8,329,736              | 7,474,898           | 89.7                      |
| Summer ZT01 R2 | 11,307,582             | 9,768,700           | 86.4                      |

|                 |            |            |      |
|-----------------|------------|------------|------|
| Summer ZT04 R1  | 8,308,713  | 7,353,942  | 88.5 |
| Summer ZT04 R2  | 9,752,315  | 8,477,008  | 86.9 |
| Summer ZT07 R1  | 7,489,482  | 6,551,179  | 87.5 |
| Summer ZT07 R2  | 9,802,883  | 8,436,946  | 86.1 |
| Summer ZT10 R1  | 8,292,323  | 7,183,739  | 86.6 |
| Summer ZT10 R2  | 10,067,093 | 8,634,538  | 85.8 |
| Summer ZT13 R1  | 7,414,155  | 6,488,395  | 87.5 |
| Summer ZT13 R2  | 9,848,313  | 8,840,377  | 89.8 |
| Summer ZT16 R1  | 8,373,408  | 7,151,758  | 85.4 |
| Summer ZT16 R2  | 10,074,990 | 9,041,720  | 89.7 |
| Summer ZT19 R1  | 8,023,590  | 6,893,871  | 85.9 |
| Summer ZT19 R2  | 8,636,414  | 7,766,293  | 89.9 |
| Summer ZT22 R1  | 8,279,696  | 7,136,863  | 86.2 |
| Summer ZT22 R2  | 10,286,399 | 9,071,636  | 88.2 |
| Migrant ZT01 R1 | 16,093,489 | 15,043,013 | 93.5 |
| Migrant ZT01 R2 | 15,823,203 | 14,866,974 | 94   |
| Migrant ZT04 R1 | 14,592,336 | 13,293,343 | 91.1 |
| Migrant ZT04 R2 | 17,808,260 | 16,668,099 | 93.6 |
| Migrant ZT07 R1 | 17,429,487 | 16,324,273 | 93.7 |
| Migrant ZT07 R2 | 17,125,519 | 16,034,231 | 93.6 |
| Migrant ZT10 R1 | 15,979,866 | 14,920,559 | 93.4 |
| Migrant ZT10 R2 | 14,289,759 | 12,589,285 | 88.1 |
| Migrant ZT13 R1 | 17,412,821 | 16,261,315 | 93.4 |
| Migrant ZT13 R2 | 18,173,157 | 17,048,724 | 93.8 |
| Migrant ZT16 R1 | 19,273,821 | 18,000,493 | 93.4 |
| Migrant ZT16 R2 | 15,910,647 | 14,849,245 | 93.3 |
| Migrant ZT19 R1 | 18,186,048 | 16,980,976 | 93.4 |
| Migrant ZT19 R2 | 17,892,892 | 16,129,214 | 90.1 |
| Migrant ZT22 R1 | 15,167,938 | 14,404,139 | 95   |
| Migrant ZT22 R2 | 15,017,821 | 13,750,935 | 91.6 |
| Average         | 13,312,703 | 12,230,335 | 91.5 |

**Table S5.** Expressed and cycling genes in the brains of LP, SP, summer-like and migrant monarchs.

| <b>Samples</b> | <b>Genes expressed</b> | <b>Cycling genes</b> | <b>% of cycling genes</b> |
|----------------|------------------------|----------------------|---------------------------|
| LP             | 10,333                 | 272                  | 2.7                       |
| SP             | 10,113                 | 268                  | 2.66                      |
| Summer-like    | 10,079                 | 282                  | 2.8                       |
| Migrant        | 10,353                 | 306                  | 3.04                      |

**Dataset S1.** RPKM values of genes with similar or differential temporal expression patterns in the brain of monarchs raised in LP and SP. Legends as in Table S1.

**Dataset S2.** RPKM values of genes with similar or differential temporal expression patterns in the brain of summer-like monarchs and wild-caught migrants. Legends as in Table S2.

## References

1. Zhu H, Gegear RJ, Casselman A, Kanginakudru S, & Reppert SM (2009) Defining behavioral and molecular differences between summer and migratory monarch butterflies. *BMC Biol* 7:14.
2. Merlin C, Gegear RJ, & Reppert SM (2009) Antennal circadian clocks coordinate sun compass orientation in migratory monarch butterflies. *Science* 325(5948):1700-1704.
3. Lugena AB, Zhang Y, Menet JS, & Merlin C (2019) Genome-wide discovery of the daily transcriptome, DNA regulatory elements and transcription factor occupancy in the monarch butterfly brain. *PLoS Genetics* 15(7):e1008265.
4. Zhan S & Reppert SM (2013) MonarchBase: the monarch butterfly genome database. *Nucleic Acids Res* 41(Database issue):D758-763.
5. Kim D, *et al.* (2013) TopHat2: accurate alignment of transcriptomes in the presence of insertions, deletions and gene fusions. *Genome Biol* 14(4).
6. Trapnell C, *et al.* (2012) Differential gene and transcript expression analysis of RNA-seq experiments with TopHat and Cufflinks. *Nat Protoc* 7(3):562-578.
7. Trapnell C, *et al.* (2010) Transcript assembly and quantification by RNA-Seq reveals unannotated transcripts and isoform switching during cell differentiation. *Nat Biotechnol* 28(5):511-U174.
8. Thaben PF & Westermark PO (2014) Detecting Rhythms in Time Series with RAIN. *Journal of Biological Rhythms* 29(6):391-400.
9. Wu G, Anafi RC, Hughes ME, Kornacker K, & Hogenesch JB (2016) MetaCycle: an integrated R package to evaluate periodicity in large scale data. *Bioinformatics* 32(21):3351-3353.



10. Altschul SF, Gish W, Miller W, Myers EW, & Lipman DJ (1990) Basic Local Alignment Search Tool. *Journal of Molecular Biology* 215(3):403-410.
11. Labun K, Montague TG, Gagnon JA, Thyme SB, & Valen E (2016) CHOPCHOP v2: a web tool for the next generation of CRISPR genome engineering. *Nucleic Acids Research* 44(W1):W272-W276.
12. Montague TG, Cruz JM, Gagnon JA, Church GM, & Valen E (2014) CHOPCHOP: a CRISPR/Cas9 and TALEN web tool for genome editing. *Nucleic Acids Research* 42(W1):W401-W407.
13. Hwang WY, *et al.* (2013) Efficient genome editing in zebrafish using a CRISPR-Cas system. *Nat Biotechnol* 31(3):227-229.
14. Jao LE, Wente SR, & Chen WB (2013) Efficient multiplex biallelic zebrafish genome editing using a CRISPR nuclease system. *P Natl Acad Sci USA* 110(34):13904-13909.
15. Zhang Y, Markert MJ, Groves SC, Hardin PE, & Merlin C (2017) Vertebrate-like CRYPTOCHROME 2 from monarch regulates circadian transcription via independent repression of CLOCK and BMAL1 activity. *Proc Natl Acad Sci U S A* 114(36):E7516-E7525.
16. Markert MJ, *et al.* (2016) Genomic Access to Monarch Migration Using TALEN and CRISPR/Cas9-Mediated Targeted Mutagenesis. *G3-Genes Genom Genet* 6(4):905-915.
17. Rohland N & Reich D (2012) Cost-effective, high-throughput DNA sequencing libraries for multiplexed target capture. *Genome Res* 22(5):939-946.
18. von Lintig J, Dreher A, Kiefer C, Wernet MF, & Vogt K (2001) Analysis of the blind *Drosophila* mutant *ninaB* identifies the gene encoding the key enzyme for vitamin A formation *in vivo*. *Proc Natl Acad Sci U S A* 98(3):1130-1135.
